# Supplementary material for: Inducible Sbds deletion impairs bone marrow niche capacity to engraft donor bone marrow after transplantation
Source: PubMed Central journal article supplement — Blood Adv. 2022 Jan 4;6(1):108–20. doi: 10.1182/bloodadvances.2021004640 (PMC8753223; doi:10.1182/bloodadvances.2021004640), 2022-01-04
Supplement: advancesADV2021004640-suppl1.pdf [file advancesADV2021004640-suppl1.pdf]

**Supplemental Table 1.** Sequences for primers used for qPCR

| <b>Gene</b>    | <b>Forward Primer</b>   | <b>Reverse Primer</b>  |
|----------------|-------------------------|------------------------|
| <i>Sbds</i>    | AGCGGGCCACATGCGATT      | CTCTGAAGCAGCCTGGGTCTGA |
| <i>Spp1</i>    | CCTGGCTGAATTCTGAGGGACT  | GCTTCTGAGATGGGTCAGGCA  |
| <i>Pparg</i>   | TCATGACCAGGGAGTTCCTC    | CAGGTTGTCTTGGATGTCCTC  |
| <i>Fabp4</i>   | ATAACCCTAGATGGCGGGGC    | GCCTCTTCCTTTGGCTCATGC  |
| <i>Adipoq</i>  | GATGGCAGAGATGGCACTCCT   | GGCCCTTCAGCTCCTGTCTATT |
| <i>Igfbp2</i>  | ACCCCTTGCCAGCAGGAGTTGGA | TCCCTGGATGGGCTTCCCGGT  |
| <i>Igfbp3</i>  | GAGGCGTCCACATCCCAAAC    | CCCTTGGTGTTCGTAGCCTGG  |
| <i>Igf1r</i>   | GATCGCGATTTCTGCGCAA     | GCCTTCGCAGGGGATACAGT   |
| <i>Raf1</i>    | GCTAATTGACATTGCCCGACA   | TTCAACCTGCTGAGAACCAC   |
| <i>Fos</i>     | GAAGACCGTGTGAGGAGGCA    | CTCCTCCGATTCCGGCACTT   |
| <i>Rpl3l</i>   | CATTTGACCTCTGGTGCCTGG   | CGAGGGGCAGAGAACTTCCG   |
| <i>Rsl24d1</i> | AGCTCACGGTGGACAACCTCA   | ATTTGGCCTGGCGCTTCTGT   |
| <i>Trp53</i>   | TCCGAAGACTGGATGACTGCCA  | CATCCTGGGGCAGCAACAGA   |
| <i>Ddit4</i>   | GAGCCTGGAGAGCTCGGAC     | AGGGACACCCCATCCAGGTAT  |
| <i>Erc5</i>    | CTAACGGGAAACAAAGGCC     | TCCCATGGCTATCTCGGACT   |
| <i>Nupr1</i>   | GATCAGTACAGCCTGGCCCAT   | AGGGCGGTTGGTATTGGCA    |
| <i>Plk2</i>    | TGGAACGTCCGCAGTGGAAA    | ACAGTCAGCTTCCGGCATGT   |

**Supplemental Table 2.** Antibodies used for flow cytometry and immunohistochemistry analysis.

| <b>Antibodies for Flow Cytometry</b>       |                    |                |              |
|--------------------------------------------|--------------------|----------------|--------------|
| <b>Target</b>                              | <b>Fluorophore</b> | <b>Company</b> | <b>Clone</b> |
| CD117(c-Kit)                               | APC-eFlour780      | eBioscience    | ACK2         |
| CD11b                                      | PE-Cy7             | eBioscience    | M1/70        |
| CD150                                      | PerCP-eFluor710    | eBioscience    | mShad150     |
| CD31                                       | FITC               | BioLegend      | 390          |
| CD3e                                       | PE                 | eBioscience    | 145-2C11     |
| CD4                                        | PE-Cy7             | BD Pharmingen  | RM4-5        |
| CD45                                       | APC                | eBioscience    | 30-F11       |
| CD45R(B220)                                | PE-Cy7             | eBioscience    | RA3-6B2      |
| CD48                                       | APC                | eBioscience    | HM48-1       |
| CD51                                       | PE                 | BioLegend      | RMV-7        |
| CD8a                                       | PE-Cy7             | eBioscience    | 53-6.7       |
| F4/80                                      | AlexiaFluor647     | BioLegend      | BM8          |
| Ly6A/E(Sca-1)                              | PE                 | BD Pharmingen  | D7           |
| Ly6G                                       | FITC               | BioLegend      | 1A8          |
| Ly6G(Gr1)                                  | PE-Cy7             | eBioscience    | RB6-8C5      |
| TER-119                                    | PE-Cy7             | eBioscience    | TER-119      |
| TER-119                                    | AlexiaFluor647     | BioLegend      | TER-119      |
| <b>Antibodies for Immunohistochemistry</b> |                    |                |              |
| <b>Target</b>                              | <b>Company</b>     | <b>Catalog</b> |              |
| Active Caspase-3                           | R&D Systems        | AF835          |              |
| PPAR- $\gamma$                             | Invitrogen         | MA5-14889      |              |
| SDF1(CXCL12)                               | Invitrogen         | PA5-114344     |              |

**Supplemental Table 3.** Gene set enrichment analysis results show dysregulated signaling pathways in the bone marrow stromal cells from *Mx1<sup>Cre</sup>Sbds<sup>Exc</sup>* mice compared to *Sbds<sup>fl</sup>* controls ( $p < 0.05$ ,  $FDR < 0.25$ )

| Gene set                                                                     | NES  | p Value | FDR   |
|------------------------------------------------------------------------------|------|---------|-------|
| <b>Enriched in <i>Mx1<sup>Cre</sup>Sbds<sup>fl</sup></i></b>                 |      |         |       |
| HALLMARK_HEME_METABOLISM                                                     | 6.68 | 0.000   | 0.000 |
| NABA_CORE_MATRISOME                                                          | 5.49 | 0.000   | 0.000 |
| HALLMARK_EPITHELIAL_MESENCHYMAL_TRANSITION                                   | 5.32 | 0.000   | 0.000 |
| NABA_MATRISOME_ASSOCIATED                                                    | 5.01 | 0.000   | 0.000 |
| NABA_ECM_GLYCOPROTEINS                                                       | 4.52 | 0.000   | 0.000 |
| HALLMARK_MYOGENESIS                                                          | 3.96 | 0.000   | 0.000 |
| KEGG_ECM_RECEPTOR_INTERACTION                                                | 3.58 | 0.000   | 0.000 |
| PID_INTEGRIN1_PATHWAY                                                        | 3.51 | 0.000   | 0.000 |
| NABA_SECRETED_FACTORS                                                        | 3.42 | 0.000   | 0.000 |
| NABA_ECM_REGULATORS                                                          | 3.31 | 0.000   | 0.000 |
| NABA_PROTEOGLYCANS                                                           | 2.95 | 0.000   | 0.000 |
| REACTOME_COLLAGEN_FORMATION                                                  | 2.87 | 0.000   | 0.000 |
| REACTOME_EXTRACELLULAR_MATRIX_ORGANIZATION                                   | 2.76 | 0.000   | 0.000 |
| NABA_COLLAGENS                                                               | 2.71 | 0.000   | 0.000 |
| KEGG_FOCAL_ADHESION                                                          | 2.71 | 0.000   | 0.000 |
| REACTOME_NETRIN1_SIGNALING                                                   | 2.70 | 0.000   | 0.000 |
| KEGG_BASAL_CELL_CARCINOMA                                                    | 2.66 | 0.000   | 0.001 |
| REACTOME_AMINO_ACID_TRANSPORT_ACROSS_THE_PLASMA_MEMBRANE                     | 2.64 | 0.000   | 0.001 |
| NABA_BASEMENT_MEMBRANES                                                      | 2.61 | 0.000   | 0.001 |
| PID_INTEGRIN3_PATHWAY                                                        | 2.59 | 0.000   | 0.001 |
| REACTOME_GLYCOSAMINOGLYCAN_METABOLISM                                        | 2.57 | 0.000   | 0.002 |
| HALLMARK_KRAS_SIGNALING_UP                                                   | 2.57 | 0.000   | 0.002 |
| HALLMARK_APICAL_JUNCTION                                                     | 2.54 | 0.000   | 0.002 |
| HALLMARK_UV_RESPONSE_DN                                                      | 2.54 | 0.000   | 0.002 |
| PID_AVB3_INTEGRIN_PATHWAY                                                    | 2.50 | 0.000   | 0.002 |
| REACTOME_NCAM1_INTERACTIONS                                                  | 2.47 | 0.000   | 0.002 |
| REACTOME_INTEGRIN_CELL_SURFACE_INTERACTIONS                                  | 2.42 | 0.000   | 0.004 |
| REACTOME_TRANSPORT_OF_INORGANIC_CATIONS_ANIONS_AND_AMINO_ACIDS_OLIGOPEPTIDES | 2.40 | 0.000   | 0.004 |
| PID_WNT_SIGNALING_PATHWAY                                                    | 2.38 | 0.000   | 0.005 |
| BIOCARTA_P53HYPOXIA_PATHWAY                                                  | 2.38 | 0.000   | 0.005 |
| KEGG_CELL_ADHESION_MOLECULES_CAMS                                            | 2.37 | 0.000   | 0.005 |
| HALLMARK_ESTROGEN_RESPONSE_EARLY                                             | 2.34 | 0.004   | 0.006 |
| REACTOME_AXON_GUIDANCE                                                       | 2.29 | 0.002   | 0.008 |
| REACTOME_AMINO_ACID_AND_OLIGOPEPTIDE_SLC_TRANSPORTERS                        | 2.28 | 0.000   | 0.008 |
| PID_INTEGRIN_A9B1_PATHWAY                                                    | 2.26 | 0.002   | 0.009 |
| HALLMARK_APICAL_SURFACE                                                      | 2.26 | 0.002   | 0.009 |
| HALLMARK_ADIPOGENESIS                                                        | 2.23 | 0.000   | 0.010 |
| BIOCARTA_COMP_PATHWAY                                                        | 2.23 | 0.002   | 0.010 |
| REACTOME_HS_GAG_BIOSYNTHESIS                                                 | 2.22 | 0.000   | 0.011 |
| BIOCARTA_ALK_PATHWAY                                                         | 2.21 | 0.002   | 0.012 |
| PID_SYNDECAN_4_PATHWAY                                                       | 2.20 | 0.002   | 0.012 |
| REACTOME_DEVELOPMENTAL_BIOLOGY                                               | 2.19 | 0.002   | 0.012 |

|                                                                            |      |       |       |
|----------------------------------------------------------------------------|------|-------|-------|
| REACTOME_GENERATION_OF_SECOND_MESSENGER_MOLECULES                          | 2.16 | 0.006 | 0.015 |
| HALLMARK_ANGIOGENESIS                                                      | 2.16 | 0.002 | 0.014 |
| HALLMARK_XENOBIOTIC_METABOLISM                                             | 2.16 | 0.002 | 0.014 |
| REACTOME_3_UTR_MEDIATED_TRANSLATIONAL_REGULATION                           | 2.15 | 0.000 | 0.015 |
| REACTOME_CLASS_B_2_SECRETIN_FAMILY_RECEPTORS                               | 2.11 | 0.000 | 0.019 |
| KEGG_AXON_GUIDANCE                                                         | 2.10 | 0.002 | 0.020 |
| REACTOME_HEPARAN_SULFATE_HEPARIN_HS_GAG_METABOLISM                         | 2.06 | 0.008 | 0.023 |
| REACTOME_COSTIMULATION_BY_THE_CD28_FAMILY                                  | 2.05 | 0.000 | 0.024 |
| REACTOME_CELL_CELL_JUNCTION_ORGANIZATION                                   | 2.04 | 0.006 | 0.026 |
| BIOCARTA_CTLA4_PATHWAY                                                     | 2.04 | 0.006 | 0.027 |
| REACTOME_CELL_JUNCTION_ORGANIZATION                                        | 2.03 | 0.012 | 0.028 |
| REACTOME_MYOGENESIS                                                        | 2.01 | 0.002 | 0.029 |
| BIOCARTA_NFAT_PATHWAY                                                      | 2.01 | 0.002 | 0.029 |
| KEGG_ARRHYTHMOGENIC_RIGHT_VENTRICULAR_CARDIOMYOPATHY_ARVC                  | 2.00 | 0.006 | 0.031 |
| KEGG_HEMATOPOIETIC_CELL_LINEAGE                                            | 2.00 | 0.006 | 0.030 |
| HALLMARK_HYPOXIA                                                           | 2.00 | 0.002 | 0.030 |
| REACTOME_NCAM_SIGNALING_FOR_NEURITE_OUT_GROWTH                             | 1.99 | 0.000 | 0.031 |
| KEGG_T_CELL_RECEPTOR_SIGNALING_PATHWAY                                     | 1.97 | 0.002 | 0.033 |
| PID_NFAT_TFPATHWAY                                                         | 1.97 | 0.010 | 0.034 |
| NABA_ECM_AFFILIATED                                                        | 1.96 | 0.006 | 0.035 |
| BIOCARTA_CTCF_PATHWAY                                                      | 1.96 | 0.008 | 0.035 |
| BIOCARTA_CSK_PATHWAY                                                       | 1.94 | 0.009 | 0.038 |
| REACTOME_FORMATION_OF_THE_TERNARY_COMPLEX_AND_SUBSEQUENTLY_THE_43S_COMPLEX | 1.94 | 0.004 | 0.038 |
| KEGG_DILATED_CARDIOMYOPATHY                                                | 1.92 | 0.008 | 0.043 |
| REACTOME_PI3K_EVENTS_IN_ERBB2_SIGNALING                                    | 1.91 | 0.012 | 0.043 |
| HALLMARK_COMPLEMENT                                                        | 1.91 | 0.010 | 0.043 |
| REACTOME_PI_3K_CASCADE                                                     | 1.89 | 0.010 | 0.047 |
| REACTOME KERATAN_SULFATE BIOSYNTHESIS                                      | 1.89 | 0.010 | 0.048 |
| HALLMARK_IL2_STAT5_SIGNALING                                               | 1.89 | 0.010 | 0.048 |
| REACTOME KERATAN_SULFATE KERATIN METABOLISM                                | 1.88 | 0.012 | 0.049 |
| PID_SYNDECAN_1_PATHWAY                                                     | 1.86 | 0.012 | 0.054 |
| KEGG_COMPLEMENT_AND_COAGULATION_CASCADES                                   | 1.83 | 0.016 | 0.061 |
| REACTOME_INTERACTION_BETWEEN_L1_AND_ANKYRINS                               | 1.83 | 0.012 | 0.062 |
| REACTOME_TRANSMEMBRANE_TRANSPORT_OF_SMALL_MOLECULES                        | 1.82 | 0.019 | 0.064 |
| KEGG_PRIMARY_IMMUNODEFICIENCY                                              | 1.80 | 0.010 | 0.068 |
| KEGG_PPAR_SIGNALING_PATHWAY                                                | 1.79 | 0.007 | 0.072 |
| REACTOME_A_TETRASACCHARIDE_LINKER_SEQUENCE_IS_REQUIRED_FOR_GAG_SYNTHESIS   | 1.78 | 0.008 | 0.074 |
| REACTOME_SIGNALING_BY_PDGF                                                 | 1.77 | 0.012 | 0.079 |
| KEGG_CARDIAC_MUSCLE_CONTRACTION                                            | 1.76 | 0.012 | 0.083 |
| REACTOME_GLUTATHIONE_CONJUGATION                                           | 1.75 | 0.012 | 0.083 |
| REACTOME_BASIGIN_INTERACTIONS                                              | 1.75 | 0.018 | 0.085 |
| PID_BMP_PATHWAY                                                            | 1.75 | 0.025 | 0.085 |
| REACTOME_CHONDROITIN_SULFATE_DERMATAN_SULFATE_METABOLISM                   | 1.73 | 0.016 | 0.091 |
| REACTOME_CELL_CELL_COMMUNICATION                                           | 1.73 | 0.029 | 0.091 |
| KEGG_ADHERENS_JUNCTION                                                     | 1.72 | 0.008 | 0.093 |
| KEGG_CYTOKINE_CYTOKINE_RECEPTOR_INTERACTION                                | 1.72 | 0.022 | 0.093 |

|                                                          |       |       |       |
|----------------------------------------------------------|-------|-------|-------|
| PID_FGF_PATHWAY                                          | 1.71  | 0.036 | 0.097 |
| HALLMARK_COAGULATION                                     | 1.70  | 0.019 | 0.099 |
| REACTOME_SLC_MEDIATED_TRANSMEMBRANE_TRANSPORT            | 1.69  | 0.037 | 0.101 |
| PID_HNF3A_PATHWAY                                        | 1.69  | 0.033 | 0.101 |
| PID_INTEGRIN5_PATHWAY                                    | 1.69  | 0.030 | 0.103 |
| REACTOME_PHOSPHOLIPASE_C_MEDIATED_CASCADE                | 1.68  | 0.032 | 0.104 |
| KEGG_AMINOACYL_TRNA_BIOSYNTHESIS                         | 1.67  | 0.029 | 0.107 |
| KEGG_CALCIIUM_SIGNALING_PATHWAY                          | 1.67  | 0.030 | 0.108 |
| WNT_SIGNALING                                            | 1.66  | 0.033 | 0.115 |
| BIOCARTA_NO2IL12_PATHWAY                                 | 1.64  | 0.039 | 0.121 |
| PID_DELTA_NP63_PATHWAY                                   | 1.64  | 0.027 | 0.124 |
| BIOCARTA_STATHMIN_PATHWAY                                | 1.63  | 0.033 | 0.124 |
| REACTOME_DEGRADATION_OF_THE_EXTRACELLULAR_MATRIX         | 1.63  | 0.033 | 0.125 |
| KEGG_HYPERTROPHIC_CARDIOMYOPATHY_HCM                     | 1.62  | 0.036 | 0.127 |
| HALLMARK_P53_PATHWAY                                     | 1.62  | 0.039 | 0.126 |
| PID_EPHRINB_REV_PATHWAY                                  | 1.62  | 0.040 | 0.126 |
| HALLMARK_KRAS_SIGNALING_DN                               | 1.62  | 0.033 | 0.126 |
| PID_TAP63_PATHWAY                                        | 1.61  | 0.050 | 0.129 |
| REACTOME_DOWNSTREAM_SIGNALING_OF_ACTIVATED_FGFR          | 1.61  | 0.044 | 0.129 |
| BIOCARTA_TOB1_PATHWAY                                    | 1.61  | 0.036 | 0.128 |
| REACTOME_CIRCADIAN_CLOCK                                 | 1.60  | 0.032 | 0.130 |
| REACTOME_LIPOPROTEIN_METABOLISM                          | 1.60  | 0.035 | 0.132 |
| KEGG_PORPHYRIN_AND_CHLOROPHYLL_METABOLISM                | 1.59  | 0.040 | 0.136 |
| REACTOME_PI3K_EVENTS_IN_ERBB4_SIGNALING                  | 1.56  | 0.046 | 0.151 |
| REACTOME_TCR_SIGNALING                                   | 1.52  | 0.046 | 0.172 |
| <b>Enriched in <i>Sbds</i><sup>+/+</sup> controls</b>    |       |       |       |
| REACTOME_DNA_REPLICATION                                 | -4.20 | 0.000 | 0.000 |
| REACTOME_CELL_CYCLE_MITOTIC                              | -3.87 | 0.000 | 0.000 |
| HALLMARK_E2F_TARGETS                                     | -3.85 | 0.000 | 0.000 |
| PID_IL8_CXCR2_PATHWAY                                    | -3.77 | 0.000 | 0.000 |
| REACTOME_MITOTIC_M_M_G1_PHASES                           | -3.76 | 0.000 | 0.000 |
| REACTOME_DNA_STRAND_ELONGATION                           | -3.71 | 0.000 | 0.000 |
| REACTOME_MRNA_PROCESSING                                 | -3.56 | 0.000 | 0.000 |
| REACTOME_MITOTIC_PROMETAPHASE                            | -3.56 | 0.000 | 0.000 |
| REACTOME_MRNA_SPLICING                                   | -3.53 | 0.000 | 0.000 |
| REACTOME_PROCESSING_OF_CAPPED_INTRON_CONTAINING_PRE_MRNA | -3.48 | 0.000 | 0.000 |
| HALLMARK_G2M_CHECKPOINT                                  | -3.41 | 0.000 | 0.000 |
| REACTOME_CELL_CYCLE                                      | -3.28 | 0.000 | 0.000 |
| HALLMARK_MYC_TARGETS_V1                                  | -3.26 | 0.000 | 0.000 |
| REACTOME_PLATELET_ACTIVATION_SIGNALING_AND_AGGREGATION   | -3.20 | 0.000 | 0.000 |
| REACTOME_METABOLISM_OF_RNA                               | -3.17 | 0.000 | 0.000 |
| KEGG_DNA_REPLICATION                                     | -3.12 | 0.000 | 0.000 |
| HALLMARK_DNA_REPAIR                                      | -3.12 | 0.000 | 0.000 |
| REACTOME_TRANSCRIPTION                                   | -3.06 | 0.000 | 0.000 |
| BIOCARTA_HIVNEF_PATHWAY                                  | -3.03 | 0.000 | 0.000 |
| KEGG_SPLICEOSOME                                         | -3.01 | 0.000 | 0.000 |

|                                                                           |       |       |       |
|---------------------------------------------------------------------------|-------|-------|-------|
| HALLMARK_TNFA_SIGNALING_VIA_NFKB                                          | -2.97 | 0.000 | 0.000 |
| REACTOME_HEMOSTASIS                                                       | -2.93 | 0.000 | 0.000 |
| REACTOME_CYTOKINE_SIGNALING_IN_IMMUNE_SYSTEM                              | -2.92 | 0.000 | 0.000 |
| REACTOME_EXTENSION_OF_TELOMERES                                           | -2.91 | 0.000 | 0.000 |
| KEGG_LEUKOCYTE_TRANSENDOTHELIAL_MIGRATION                                 | -2.90 | 0.000 | 0.000 |
| REACTOME_SRP_DEPENDENT_COTRANSLATIONAL_PROTEIN_TARGETING_TO_MEMBRANE      | -2.89 | 0.000 | 0.000 |
| HALLMARK_INFLAMMATORY_RESPONSE                                            | -2.82 | 0.000 | 0.000 |
| REACTOME_INFLUENZA_VIRAL_RNA_TRANSCRIPTION_AND_REPLICATION                | -2.80 | 0.000 | 0.000 |
| PID_PDGFRB_PATHWAY                                                        | -2.79 | 0.000 | 0.000 |
| HALLMARK_MITOTIC_SPINDLE                                                  | -2.78 | 0.000 | 0.000 |
| REACTOME_LAGGING_STRAND_SYNTHESIS                                         | -2.78 | 0.000 | 0.000 |
| REACTOME_INFLUENZA_LIFE_CYCLE                                             | -2.78 | 0.000 | 0.000 |
| REACTOME_RNA_POL_II_TRANSCRIPTION                                         | -2.77 | 0.000 | 0.000 |
| REACTOME_METABOLISM_OF_MRNA                                               | -2.76 | 0.000 | 0.000 |
| KEGG_FC_GAMMA_R_MEDIATED_PHAGOCYTOSIS                                     | -2.73 | 0.000 | 0.001 |
| KEGG_PHOSPHATIDYLINOSITOL_SIGNALING_SYSTEM                                | -2.73 | 0.000 | 0.001 |
| PID_IL8_CXCR1_PATHWAY                                                     | -2.71 | 0.000 | 0.001 |
| KEGG_CHEMOKINE_SIGNALING_PATHWAY                                          | -2.71 | 0.000 | 0.001 |
| KEGG_LEISHMANIA_INFECTION                                                 | -2.69 | 0.000 | 0.001 |
| KEGG_INOSITOL_PHOSPHATE_METABOLISM                                        | -2.67 | 0.000 | 0.001 |
| BIOCARTA_RHO_PATHWAY                                                      | -2.67 | 0.000 | 0.001 |
| BIOCARTA_MAPK_PATHWAY                                                     | -2.62 | 0.000 | 0.001 |
| REACTOME_GPVI_MEDIATED_ACTIVATION_CASCADE                                 | -2.60 | 0.000 | 0.001 |
| KEGG_RIBOSOME                                                             | -2.58 | 0.002 | 0.001 |
| HALLMARK_OXIDATIVE_PHOSPHORYLATION                                        | -2.58 | 0.000 | 0.001 |
| REACTOME_S_PHASE                                                          | -2.58 | 0.000 | 0.001 |
| REACTOME_RNA_POL_II_PRE_TRANSCRIPTION_EVENTS                              | -2.54 | 0.000 | 0.002 |
| REACTOME_TRANSCRIPTION_COUPLED_NER_TC_NER                                 | -2.53 | 0.000 | 0.002 |
| REACTOME_MRNA_SPLICING_MINOR_PATHWAY                                      | -2.52 | 0.000 | 0.002 |
| PID_TXA2PATHWAY                                                           | -2.50 | 0.002 | 0.002 |
| PID_MAPK_TRK_PATHWAY                                                      | -2.50 | 0.000 | 0.002 |
| REACTOME_INNATE_IMMUNE_SYSTEM                                             | -2.50 | 0.002 | 0.002 |
| KEGG_ACUTE_MYELOID_LEUKEMIA                                               | -2.49 | 0.000 | 0.002 |
| REACTOME_NONSENSE_MEDIATED_DECAY_ENHANCED_BY_THE_EXON_JUNCTION_COMPLEX    | -2.48 | 0.000 | 0.002 |
| REACTOME_ACTIVATION_OF_THE_PRE_REPLICATIVE_COMPLEX                        | -2.48 | 0.000 | 0.002 |
| KEGG_NEUROTROPHIN_SIGNALING_PATHWAY                                       | -2.47 | 0.000 | 0.003 |
| KEGG_APOPTOSIS                                                            | -2.47 | 0.000 | 0.003 |
| ST_B_CELL_ANTIGEN_RECEPTOR                                                | -2.46 | 0.000 | 0.003 |
| KEGG_B_CELL_RECEPTOR_SIGNALING_PATHWAY                                    | -2.45 | 0.000 | 0.003 |
| REACTOME_INTERFERON_SIGNALING                                             | -2.45 | 0.000 | 0.003 |
| REACTOME_LATENT_INFECTION_OF_HOMO_SAPIENS_WITH_MYCOBACTERIUM_TUBERCULOSIS | -2.44 | 0.000 | 0.003 |
| REACTOME_DNA_REPAIR                                                       | -2.44 | 0.000 | 0.003 |
| PID_CXCR4_PATHWAY                                                         | -2.44 | 0.000 | 0.003 |
| KEGG_PANCREATIC_CANCER                                                    | -2.44 | 0.000 | 0.003 |
| REACTOME_PEROXISOMAL_LIPID_METABOLISM                                     | -2.43 | 0.000 | 0.003 |
| HALLMARK_INTERFERON_GAMMA_RESPONSE                                        | -2.43 | 0.000 | 0.003 |

|                                                                       |       |       |       |
|-----------------------------------------------------------------------|-------|-------|-------|
| KEGG_NATURAL_KILLER_CELL_MEDIATED_CYTOTOXICITY                        | -2.42 | 0.002 | 0.003 |
| BIOCARTA_KERATINOCYTE_PATHWAY                                         | -2.42 | 0.000 | 0.003 |
| REACTOME_PEPTIDE_CHAIN_ELONGATION                                     | -2.41 | 0.004 | 0.004 |
| PID_AVB3_OPN_PATHWAY                                                  | -2.41 | 0.002 | 0.004 |
| REACTOME_PROCESSIVE_SYNTHESIS_ON_THE_LAGGING_STRAND                   | -2.40 | 0.000 | 0.004 |
| KEGG_PATHOGENIC_ESCHERICHIA_COLI_INFECTION                            | -2.40 | 0.000 | 0.004 |
| BIOCARTA_CERAMIDE_PATHWAY                                             | -2.40 | 0.002 | 0.004 |
| REACTOME_SIGNALLING_BY_NGF                                            | -2.39 | 0.002 | 0.004 |
| REACTOME_P75_NTR_RECEPTOR_MEDIATED_SIGNALLING                         | -2.39 | 0.000 | 0.004 |
| REACTOME_SYNTHESIS_OF_DNA                                             | -2.39 | 0.000 | 0.004 |
| PID_ERBB1_DOWNSTREAM_PATHWAY                                          | -2.38 | 0.000 | 0.004 |
| REACTOME_METABOLISM_OF_PROTEINS                                       | -2.37 | 0.000 | 0.004 |
| REACTOME_FORMATION_OF_RNA_POL_II_ELONGATION_COMPLEX                   | -2.36 | 0.000 | 0.005 |
| PID_RAC1_PATHWAY                                                      | -2.35 | 0.000 | 0.005 |
| HALLMARK_IL6_JAK_STAT3_SIGNALING                                      | -2.35 | 0.002 | 0.005 |
| PID_ILK_PATHWAY                                                       | -2.35 | 0.000 | 0.005 |
| REACTOME_CLEAVAGE_OF_GROWING_TRANSCRIPT_IN_THE_TERMINATION_REGION     | -2.34 | 0.000 | 0.005 |
| REACTOME_LATE_PHASE_OF_HIV_LIFE_CYCLE                                 | -2.33 | 0.000 | 0.005 |
| PID_HDAC_CLASSI_PATHWAY                                               | -2.31 | 0.000 | 0.006 |
| REACTOME_HIV_INFECTION                                                | -2.31 | 0.002 | 0.006 |
| REACTOME_INTERFERON_ALPHA_BETA_SIGNALING                              | -2.30 | 0.000 | 0.006 |
| REACTOME_CHROMOSOME_MAINTENANCE                                       | -2.29 | 0.002 | 0.006 |
| BIOCARTA_CDMAC_PATHWAY                                                | -2.29 | 0.002 | 0.007 |
| REACTOME_RNA_POL_I_TRANSCRIPTION                                      | -2.29 | 0.000 | 0.007 |
| KEGG_DRUG_METABOLISM_OTHER_ENZYMES                                    | -2.28 | 0.006 | 0.007 |
| REACTOME_SIGNALING_BY_ILS                                             | -2.28 | 0.002 | 0.007 |
| KEGG_STARCH_AND_SUCROSE_METABOLISM                                    | -2.27 | 0.000 | 0.007 |
| BIOCARTA_TPO_PATHWAY                                                  | -2.26 | 0.000 | 0.007 |
| REACTOME_GLUCOSE_METABOLISM                                           | -2.25 | 0.002 | 0.008 |
| PID_THROMBIN_PAR1_PATHWAY                                             | -2.24 | 0.000 | 0.008 |
| KEGG_FC_EPSILON_RI_SIGNALING_PATHWAY                                  | -2.24 | 0.002 | 0.008 |
| REACTOME_G2_M_CHECKPOINTS                                             | -2.23 | 0.000 | 0.009 |
| REACTOME_NUCLEOTIDE_EXCISION_REPAIR                                   | -2.23 | 0.000 | 0.009 |
| REACTOME_SIGNALLING_TO_RAS                                            | -2.22 | 0.004 | 0.009 |
| REACTOME_SEMA4D_IN_SEMAPHORIN_SIGNALING                               | -2.21 | 0.000 | 0.009 |
| REACTOME_SEMA4D_INDUCED_CELL_MIGRATION_AND_GROWTH_CONE_COLLAPSE       | -2.21 | 0.000 | 0.009 |
| KEGG_CELL_CYCLE                                                       | -2.21 | 0.002 | 0.009 |
| REACTOME_HIV_LIFE_CYCLE                                               | -2.21 | 0.002 | 0.009 |
| REACTOME_MEIOSIS                                                      | -2.19 | 0.002 | 0.011 |
| REACTOME_G1_S_TRANSITION                                              | -2.19 | 0.002 | 0.011 |
| REACTOME_FORMATION_OF_THE_HIV1_EARLY_ELONGATION_COMPLEX               | -2.18 | 0.000 | 0.011 |
| REACTOME_THE_ROLE_OF_NEF_IN_HIV1_REPLICATION_AND_DISEASE_PATHOGENESIS | -2.18 | 0.002 | 0.011 |
| REACTOME_RNA_POL_I_RNA_POL_III_AND_MITOCHONDRIAL_TRANSCRIPTION        | -2.17 | 0.002 | 0.012 |
| SA_B_CELL_RECEPTOR_COMPLEXES                                          | -2.17 | 0.004 | 0.012 |
| BIOCARTA_FCER1_PATHWAY                                                | -2.17 | 0.000 | 0.012 |
| PID_ER_NONGENOMIC_PATHWAY                                             | -2.17 | 0.002 | 0.012 |

|                                                                       |       |       |       |
|-----------------------------------------------------------------------|-------|-------|-------|
| REACTOME_ACTIVATION_OF_ATR_IN_RESPONSE_TO_REPLICATION_STRESS          | -2.16 | 0.002 | 0.012 |
| PID_GMCSF_PATHWAY                                                     | -2.15 | 0.002 | 0.013 |
| PID_TCR_PATHWAY                                                       | -2.14 | 0.000 | 0.013 |
| REACTOME_TRANSLATION                                                  | -2.14 | 0.002 | 0.013 |
| REACTOME_TOLL_RECEPTOR_CASCADES                                       | -2.13 | 0.002 | 0.014 |
| KEGG_HUNTINGTONS_DISEASE                                              | -2.13 | 0.004 | 0.014 |
| KEGG_PYRIMIDINE_METABOLISM                                            | -2.12 | 0.004 | 0.015 |
| PID_FCER1_PATHWAY                                                     | -2.11 | 0.002 | 0.015 |
| PID_RAC1_REG_PATHWAY                                                  | -2.11 | 0.002 | 0.015 |
| REACTOME_MITOTIC_G1_G1_S_PHASES                                       | -2.11 | 0.000 | 0.016 |
| PID_PLK1_PATHWAY                                                      | -2.10 | 0.002 | 0.016 |
| PID_CASPASE_PATHWAY                                                   | -2.10 | 0.002 | 0.016 |
| BIOCARTA_RACCYCD_PATHWAY                                              | -2.10 | 0.002 | 0.016 |
| REACTOME_PLATELET_AGGREGATION_PLUG_FORMATION                          | -2.08 | 0.002 | 0.018 |
| KEGG_REGULATION_OF_ACTIN_CYTOSKELETON                                 | -2.08 | 0.002 | 0.018 |
| BIOCARTA_PDGF_PATHWAY                                                 | -2.08 | 0.006 | 0.018 |
| PID_S1P_S1P2_PATHWAY                                                  | -2.08 | 0.002 | 0.018 |
| ST_TUMOR_NECROSIS_FACTOR_PATHWAY                                      | -2.07 | 0.000 | 0.018 |
| PID_PI3KI_PATHWAY                                                     | -2.07 | 0.004 | 0.018 |
| REACTOME_ENDOSOMAL_SORTING_COMPLEX_REQUIRED_FOR_TRANSPORT_ESCRT       | -2.07 | 0.004 | 0.018 |
| REACTOME_G_PROTEIN_BETA_GAMMA_SIGNALLING                              | -2.06 | 0.008 | 0.019 |
| REACTOME_ADAPTIVE_IMMUNE_SYSTEM                                       | -2.06 | 0.004 | 0.019 |
| REACTOME_RNA_POL_II_TRANSCRIPTION_PRE_INITIATION_AND_PROMOTER_OPENING | -2.06 | 0.002 | 0.019 |
| KEGG_OLFACTORY_TRANSDUCTION                                           | -2.05 | 0.004 | 0.019 |
| PID_VEGFR1_2_PATHWAY                                                  | -2.04 | 0.000 | 0.020 |
| SIG_BCR_SIGNALING_PATHWAY                                             | -2.04 | 0.008 | 0.020 |
| BIOCARTA_INTEGRIN_PATHWAY                                             | -2.04 | 0.006 | 0.021 |
| REACTOME_G1_S_SPECIFIC_TRANSCRIPTION                                  | -2.03 | 0.004 | 0.021 |
| BIOCARTA_GLEEVEC_PATHWAY                                              | -2.02 | 0.002 | 0.022 |
| PID_ATR_PATHWAY                                                       | -2.02 | 0.002 | 0.023 |
| PID_ARF6_PATHWAY                                                      | -2.01 | 0.008 | 0.023 |
| HALLMARK_APOPTOSIS                                                    | -2.01 | 0.008 | 0.023 |
| HALLMARK_INTERFERON_ALPHA_RESPONSE                                    | -2.01 | 0.006 | 0.023 |
| KEGG_SNARE_INTERACTIONS_IN_VESICULAR_TRANSPORT                        | -2.01 | 0.006 | 0.024 |
| BIOCARTA_BCR_PATHWAY                                                  | -2.00 | 0.000 | 0.024 |
| BIOCARTA_ECM_PATHWAY                                                  | -2.00 | 0.008 | 0.024 |
| REACTOME_REGULATION_OF_MITOTIC_CELL_CYCLE                             | -2.00 | 0.006 | 0.024 |
| REACTOME_ACTIVATED_TLR4_SIGNALLING                                    | -2.00 | 0.002 | 0.025 |
| BIOCARTA_TNFR1_PATHWAY                                                | -1.99 | 0.006 | 0.025 |
| ST_T_CELL_SIGNAL_TRANSDUCTION                                         | -1.99 | 0.006 | 0.025 |
| REACTOME_IL_2_SIGNALING                                               | -1.99 | 0.012 | 0.025 |
| KEGG_EPITHELIAL_CELL_SIGNALING_IN_HELICOBACTER_PYLORI_INFECTION       | -1.99 | 0.008 | 0.025 |
| KEGG_ALZHEIMERS_DISEASE                                               | -1.98 | 0.008 | 0.027 |
| KEGG_CHRONIC_MYELOID_LEUKEMIA                                         | -1.98 | 0.002 | 0.027 |
| BIOCARTA_NKCELLS_PATHWAY                                              | -1.98 | 0.004 | 0.027 |
| PID_ENDOTHELIN_PATHWAY                                                | -1.97 | 0.006 | 0.027 |



|                                                                       |       |       |       |
|-----------------------------------------------------------------------|-------|-------|-------|
| REACTOME_MYD88_MAL_CASCADE_INITIATED_ON_PLASMA_MEMBRANE               | -1.97 | 0.002 | 0.027 |
| SIG_PIP3_SIGNALING_IN_B_LYMPHOCYTES                                   | -1.97 | 0.002 | 0.027 |
| REACTOME_MEIOTIC_RECOMBINATION                                        | -1.97 | 0.006 | 0.027 |
| REACTOME_FORMATION_OF_TRANSCRIPTION_COUPLED_NER_TC_NER_REPAIR_COMPLEX | -1.97 | 0.002 | 0.027 |
| REACTOME_APC_CDC20_MEDIATED_DEGRADATION_OF_NEK2A                      | -1.96 | 0.013 | 0.027 |
| BIOCARTA_RAS_PATHWAY                                                  | -1.96 | 0.004 | 0.027 |
| REACTOME_OLFACTORY_SIGNALING_PATHWAY                                  | -1.96 | 0.004 | 0.027 |
| REACTOME_CELL_CYCLE_CHECKPOINTS                                       | -1.96 | 0.004 | 0.028 |
| REACTOME_PROCESSING_OF_CAPPED_INTRONLESS_PRE_MRNA                     | -1.95 | 0.004 | 0.029 |
| REACTOME_CHOLESTEROL_BIOSYNTHESIS                                     | -1.95 | 0.006 | 0.029 |
| HALLMARK_ALLOGRAFT_REJECTION                                          | -1.95 | 0.010 | 0.029 |
| KEGG_STEROID_HORMONE_BIOSYNTHESIS                                     | -1.93 | 0.012 | 0.032 |
| REACTOME_INTRINSIC_PATHWAY_FOR_APOPTOSIS                              | -1.93 | 0.010 | 0.032 |
| REACTOME_INSULIN_RECEPTOR_RECYCLING                                   | -1.92 | 0.010 | 0.034 |
| PID_HIV_NEF_PATHWAY                                                   | -1.92 | 0.012 | 0.034 |
| REACTOME_TELOMERE_MAINTENANCE                                         | -1.91 | 0.011 | 0.034 |
| REACTOME_RECYCLING_PATHWAY_OF_L1                                      | -1.91 | 0.006 | 0.034 |
| PID_ALPHA_SYNUCLEIN_PATHWAY                                           | -1.91 | 0.008 | 0.035 |
| REACTOME_MITOTIC_G2_G2_M_PHASES                                       | -1.91 | 0.002 | 0.035 |
| BIOCARTA_EGF_PATHWAY                                                  | -1.91 | 0.004 | 0.035 |
| SA_PTEN_PATHWAY                                                       | -1.91 | 0.016 | 0.035 |
| HALLMARK_PI3K_AKT_MTOR_SIGNALING                                      | -1.90 | 0.012 | 0.035 |
| REACTOME_SIGNALING_BY_SCF_KIT                                         | -1.90 | 0.009 | 0.036 |
| BIOCARTA_MPR_PATHWAY                                                  | -1.90 | 0.006 | 0.036 |
| PID_BCR_5PATHWAY                                                      | -1.90 | 0.013 | 0.037 |
| KEGG_PROGESTERONE_MEDIATED_OOCYTE_MATURATION                          | -1.89 | 0.014 | 0.037 |
| PID_THROMBIN_PAR4_PATHWAY                                             | -1.89 | 0.014 | 0.037 |
| REACTOME_SEMAPHORIN_INTERACTIONS                                      | -1.89 | 0.006 | 0.037 |
| KEGG_NON_SMALL_CELL_LUNG_CANCER                                       | -1.89 | 0.004 | 0.037 |
| REACTOME_METABOLISM_OF_NON_CODING_RNA                                 | -1.89 | 0.008 | 0.038 |
| KEGG_RETINOL_METABOLISM                                               | -1.88 | 0.010 | 0.038 |
| REACTOME_E2F_MEDIATED_REGULATION_OF_DNA_REPLICATION                   | -1.88 | 0.019 | 0.038 |
| REACTOME_TRANSPORT_OF_MATURE_TRANSCRIPT_TO_CYTOPLASM                  | -1.88 | 0.004 | 0.038 |
| REACTOME_RNA_POL_I_TRANSCRIPTION_INITIATION                           | -1.88 | 0.008 | 0.038 |
| REACTOME_M_G1_TRANSITION                                              | -1.88 | 0.008 | 0.037 |
| REACTOME_GASTRIN_CREB_SIGNALLING_PATHWAY_VIA_PKC_AND_MAPK             | -1.88 | 0.008 | 0.037 |
| PID_P38_MK2_PATHWAY                                                   | -1.88 | 0.014 | 0.038 |
| PID_NFKAPPAB_ATYPICAL_PATHWAY                                         | -1.88 | 0.014 | 0.038 |
| PID_FANCONI_PATHWAY                                                   | -1.88 | 0.012 | 0.038 |
| PID_LYSOPHOSPHOLIPID_PATHWAY                                          | -1.87 | 0.024 | 0.038 |
| BIOCARTA_P38MAPK_PATHWAY                                              | -1.87 | 0.018 | 0.039 |
| BIOCARTA_IGF1_PATHWAY                                                 | -1.87 | 0.020 | 0.040 |
| BIOCARTA_FMLP_PATHWAY                                                 | -1.86 | 0.016 | 0.040 |
| BIOCARTA_RELA_PATHWAY                                                 | -1.86 | 0.012 | 0.040 |
| REACTOME_INTERFERON_GAMMA_SIGNALING                                   | -1.86 | 0.010 | 0.041 |
| BIOCARTA_EPO_PATHWAY                                                  | -1.86 | 0.022 | 0.040 |

|                                                                                       |       |       |       |
|---------------------------------------------------------------------------------------|-------|-------|-------|
| REACTOME_ANTIGEN_ACTIVATES_B_CELL_RECEPTOR_LEADING_TO_GENERATION_OF_SECOND_MESSENGERS | -1.86 | 0.012 | 0.040 |
| PID_P75_NTR_PATHWAY                                                                   | -1.85 | 0.008 | 0.041 |
| REACTOME_ELONGATION_ARREST_AND_RECOVERY                                               | -1.84 | 0.020 | 0.044 |
| ST_ERK1_ERK2_MAPK_PATHWAY                                                             | -1.83 | 0.017 | 0.045 |
| REACTOME_NFKB_AND_MAP_KINASES_ACTIVATION_MEDIATED_BY_TLR4_SIGNALING_REPERTOIRE        | -1.83 | 0.020 | 0.045 |
| PID_CMYB_PATHWAY                                                                      | -1.83 | 0.018 | 0.046 |
| REACTOME_FACTORS_INVOLVED_IN_MEGAKARYOCYTE_DEVELOPMENT_AND_PLATELET_PRODUCTION        | -1.83 | 0.012 | 0.046 |
| PID_AR_NONGENOMIC_PATHWAY                                                             | -1.83 | 0.016 | 0.046 |
| REACTOME_IL_3_5_AND_GM-CSF_SIGNALING                                                  | -1.83 | 0.016 | 0.046 |
| KEGG_AMINO_SUGAR_AND_NUCLEOTIDE_SUGAR_METABOLISM                                      | -1.82 | 0.014 | 0.046 |
| SIG_CHEMOTAXIS                                                                        | -1.82 | 0.014 | 0.046 |
| KEGG_MISMATCH_REPAIR                                                                  | -1.82 | 0.012 | 0.046 |
| KEGG_ASTHMA                                                                           | -1.82 | 0.022 | 0.047 |
| PID_IL6_7_PATHWAY                                                                     | -1.82 | 0.008 | 0.047 |
| BIOCARTA_IL2RB_PATHWAY                                                                | -1.82 | 0.008 | 0.047 |
| PID_TOLL_ENDOGENOUS_PATHWAY                                                           | -1.82 | 0.021 | 0.047 |
| KEGG_RENAL_CELL_CARCINOMA                                                             | -1.82 | 0.014 | 0.047 |
| ST_FAS_SIGNALING_PATHWAY                                                              | -1.81 | 0.020 | 0.048 |
| REACTOME_MRNA_3_END_PROCESSING                                                        | -1.81 | 0.014 | 0.048 |
| REACTOME_G0_AND_EARLY_G1                                                              | -1.81 | 0.013 | 0.048 |
| BIOCARTA_UCALPAIN_PATHWAY                                                             | -1.81 | 0.015 | 0.048 |
| SIG_REGULATION_OF_THE_ACTIN_CYTOSKELETON_BY_RHO_GTPASES                               | -1.80 | 0.020 | 0.049 |
| PID_CERAMIDE_PATHWAY                                                                  | -1.80 | 0.024 | 0.049 |
| KEGG_HOMOLOGOUS_RECOMBINATION                                                         | -1.79 | 0.026 | 0.051 |
| BIOCARTA_PYK2_PATHWAY                                                                 | -1.79 | 0.016 | 0.051 |
| BIOCARTA_IL6_PATHWAY                                                                  | -1.79 | 0.024 | 0.052 |
| PID_HDAC_CLASSII_PATHWAY                                                              | -1.79 | 0.018 | 0.051 |
| REACTOME_APC_C_CDC20_MEDIATED_DEGRADATION_OF_MITOTIC_PROTEINS                         | -1.79 | 0.020 | 0.052 |
| REACTOME_RAP1_SIGNALLING                                                              | -1.79 | 0.026 | 0.052 |
| REACTOME_CELL_DEATH_SIGNALLING_VIA_NRAGE_NRF1_AND_NADE                                | -1.78 | 0.021 | 0.053 |
| KEGG_TOLL_LIKE_RECEPTOR_SIGNALING_PATHWAY                                             | -1.78 | 0.022 | 0.053 |
| KEGG_PENTOSE_AND_GLUCURONATE_INTERCONVERSIONS                                         | -1.78 | 0.017 | 0.053 |
| REACTOME_ANTIVIRAL_MECHANISM_BY_IFN_STIMULATED_GENES                                  | -1.78 | 0.022 | 0.053 |
| KEGG_VEGF_SIGNALING_PATHWAY                                                           | -1.78 | 0.014 | 0.053 |
| REACTOME_SHC1_EVENTS_IN_EGFR_SIGNALING                                                | -1.77 | 0.014 | 0.055 |
| PID_MET_PATHWAY                                                                       | -1.77 | 0.014 | 0.055 |
| BIOCARTA_FAS_PATHWAY                                                                  | -1.77 | 0.016 | 0.056 |
| KEGG_COLORECTAL_CANCER                                                                | -1.76 | 0.016 | 0.056 |
| BIOCARTA_TFF_PATHWAY                                                                  | -1.76 | 0.018 | 0.056 |
| REACTOME_SIGNAL_TRANSDUCTION_BY_L1                                                    | -1.76 | 0.018 | 0.057 |
| KEGG_PENTOSE_PHOSPHATE_PATHWAY                                                        | -1.76 | 0.020 | 0.057 |
| KEGG_GALACTOSE_METABOLISM                                                             | -1.75 | 0.026 | 0.058 |
| BIOCARTA_ACTINY_PATHWAY                                                               | -1.75 | 0.016 | 0.059 |
| HALLMARK_MTORC1_SIGNALING                                                             | -1.75 | 0.021 | 0.059 |
| BIOCARTA_CXCR4_PATHWAY                                                                | -1.75 | 0.026 | 0.060 |

|                                                                                                                                      |       |       |       |
|--------------------------------------------------------------------------------------------------------------------------------------|-------|-------|-------|
| REACTOME_ERK_MAPK_TARGETS                                                                                                            | -1.75 | 0.025 | 0.060 |
| REACTOME_GLOBAL_GENOMIC_NER_GG_NER                                                                                                   | -1.74 | 0.012 | 0.061 |
| REACTOME_INHIBITION_OF_THE_PROTEOLYTIC_ACTIVITY_OF_APC_C_REQUIRED_FOR_THE_ONSET_OF_ANAPHASE_BY_MITOTIC_SPINDLE_CHECKPOINT_COMPONENTS | -1.73 | 0.024 | 0.063 |
| REACTOME_APC_C_CDH1_MEDIATED_DEGRADATION_OF_CDC20_AND_OTHER_APC_C_CDH1_TARGETED_PROTEINS_IN_LATE_MITOSIS_EARLY_G1                    | -1.73 | 0.026 | 0.063 |
| REACTOME_METABOLISM_OF_NUCLEOTIDES                                                                                                   | -1.73 | 0.022 | 0.063 |
| BIOCARTA_CCR3_PATHWAY                                                                                                                | -1.73 | 0.030 | 0.064 |
| HALLMARK_MYC_TARGETS_V2                                                                                                              | -1.73 | 0.016 | 0.064 |
| KEGG_BASE_EXCISION_REPAIR                                                                                                            | -1.72 | 0.027 | 0.065 |
| PID_CXCR3_PATHWAY                                                                                                                    | -1.72 | 0.038 | 0.065 |
| REACTOME_TRIF_MEDIATED_TLR3_SIGNALING                                                                                                | -1.72 | 0.027 | 0.066 |
| BIOCARTA_MAL_PATHWAY                                                                                                                 | -1.72 | 0.024 | 0.067 |
| REACTOME_PI_METABOLISM                                                                                                               | -1.71 | 0.032 | 0.067 |
| REACTOME_ABORTIVE_ELONGATION_OF_HIV1_TRANSCRIPT_IN_THE_ABSENCE_OF_TAT                                                                | -1.71 | 0.028 | 0.067 |
| REACTOME_REGULATION_OF_SIGNALING_BY_CBL                                                                                              | -1.71 | 0.025 | 0.067 |
| PID_HEDGEHOG_GLI_PATHWAY                                                                                                             | -1.71 | 0.030 | 0.067 |
| REACTOME_SHC_RELATED_EVENTS                                                                                                          | -1.71 | 0.028 | 0.068 |
| KEGG_PURINE_METABOLISM                                                                                                               | -1.70 | 0.029 | 0.070 |
| REACTOME_MRNA_CAPPING                                                                                                                | -1.70 | 0.031 | 0.071 |
| REACTOME_DEPOSITION_OF_NEW_CENPA_CONTAINING_NUCLEOSOMES_AT_THE_CENTROMERE                                                            | -1.70 | 0.027 | 0.071 |
| PID_ARF6_DOWNSTREAM_PATHWAY                                                                                                          | -1.70 | 0.037 | 0.071 |
| PID_RHOA_PATHWAY                                                                                                                     | -1.70 | 0.032 | 0.071 |
| REACTOME_RNA_POL_I_TRANSCRIPTION_TERMINATION                                                                                         | -1.70 | 0.018 | 0.071 |
| REACTOME_SIGNALLING_TO_ERKS                                                                                                          | -1.70 | 0.026 | 0.071 |
| REACTOME_APC_C_CDC20_MEDIATED_DEGRADATION_OF_CYCLIN_B                                                                                | -1.69 | 0.026 | 0.071 |
| REACTOME_AUTODEGRADATION_OF_CDH1_BY_CDH1_APC_C                                                                                       | -1.69 | 0.026 | 0.071 |
| SIG_INSULIN_RECEPTOR_PATHWAY_IN_CARDIAC_MYOCYTES                                                                                     | -1.69 | 0.028 | 0.071 |
| ST_PHOSPHOINOSITIDE_3_KINASE_PATHWAY                                                                                                 | -1.69 | 0.030 | 0.073 |
| REACTOME_BASE_EXCISION_REPAIR                                                                                                        | -1.69 | 0.035 | 0.073 |
| REACTOME_APOPTOSIS                                                                                                                   | -1.68 | 0.019 | 0.074 |
| SA_MMP_CYTOKINE_CONNECTION                                                                                                           | -1.68 | 0.021 | 0.074 |
| PID_IL3_PATHWAY                                                                                                                      | -1.68 | 0.033 | 0.075 |
| REACTOME_G_ALPHA1213_SIGNALLING_EVENTS                                                                                               | -1.68 | 0.020 | 0.075 |
| REACTOME_SIGNALING_BY_RHO_GTPASES                                                                                                    | -1.67 | 0.037 | 0.077 |
| BIOCARTA_IGF1R_PATHWAY                                                                                                               | -1.66 | 0.033 | 0.081 |
| KEGG_PEROXISOME                                                                                                                      | -1.66 | 0.034 | 0.081 |
| BIOCARTA_GH_PATHWAY                                                                                                                  | -1.66 | 0.042 | 0.081 |
| KEGG_MAPK_SIGNALING_PATHWAY                                                                                                          | -1.66 | 0.030 | 0.082 |
| REACTOME_ACTIVATION_OF_BH3_ONLY_PROTEINS                                                                                             | -1.66 | 0.029 | 0.081 |
| REACTOME_TRANS_GOLGI_NETWORK_VESICLE_BUDDING                                                                                         | -1.66 | 0.036 | 0.082 |
| REACTOME_RESOLUTION_OF_AP_SITES_VIA_THE_MULTIPLE_NUCLEOTID_E_PATCH_REPLACEMENT_PATHWAY                                               | -1.65 | 0.030 | 0.082 |
| BIOCARTA_CHEMICAL_PATHWAY                                                                                                            | -1.65 | 0.034 | 0.083 |
| BIOCARTA_INSULIN_PATHWAY                                                                                                             | -1.65 | 0.037 | 0.084 |
| REACTOME_SIGNALING_BY_NOTCH                                                                                                          | -1.64 | 0.027 | 0.087 |
| REACTOME_INTEGRIN_ALPHAIIB_BETA3_SIGNALING                                                                                           | -1.64 | 0.038 | 0.088 |

|                                                                     |       |       |       |
|---------------------------------------------------------------------|-------|-------|-------|
| KEGG_PARKINSONS_DISEASE                                             | -1.63 | 0.042 | 0.090 |
| BIOCARTA_HSP27_PATHWAY                                              | -1.63 | 0.045 | 0.092 |
| REACTOME_PHOSPHORYLATION_OF_THE_APC_C                               | -1.62 | 0.037 | 0.092 |
| REACTOME_GOLGI_ASSOCIATED_VESICLE_BIOGENESIS                        | -1.62 | 0.039 | 0.094 |
| REACTOME_SIGNAL_AMPLIFICATION                                       | -1.62 | 0.024 | 0.094 |
| REACTOME_NUCLEAR_EVENTS_KINASE_AND_TRANSCRIPTION_FACTOR_ACTIVATION  | -1.62 | 0.041 | 0.094 |
| PID_E2F_PATHWAY                                                     | -1.62 | 0.031 | 0.094 |
| KEGG_OOCYTE_MEIOSIS                                                 | -1.61 | 0.044 | 0.096 |
| PID_EPO_PATHWAY                                                     | -1.61 | 0.040 | 0.096 |
| REACTOME_HOST_INTERACTIONS_OF_HIV_FACTORS                           | -1.61 | 0.033 | 0.096 |
| BIOCARTA_IL2_PATHWAY                                                | -1.61 | 0.033 | 0.098 |
| REACTOME_NEGATIVE_REGULATION_OF_FGFR_SIGNALING                      | -1.60 | 0.045 | 0.099 |
| REACTOME_ACTIVATED_AMPK_STIMULATES_FATTY_ACID_OXIDATION_IN_MUSCLE   | -1.60 | 0.040 | 0.102 |
| REACTOME_G_BETA_GAMMA_SIGNALLING_THROUGH_PI3KGAMMA                  | -1.59 | 0.037 | 0.105 |
| HALLMARK_REACTIVE_OXIGEN_SPECIES_PATHWAY                            | -1.59 | 0.047 | 0.105 |
| KEGG_GLIOMA                                                         | -1.59 | 0.047 | 0.106 |
| KEGG_NUCLEOTIDE_EXCISION_REPAIR                                     | -1.58 | 0.046 | 0.110 |
| REACTOME_CONVERSION_FROM_APC_C_CDC20_TO_APC_C_CDH1_IN_LATE_ANAPHASE | -1.56 | 0.044 | 0.117 |
| REACTOME_ER_PHAGOSOME_PATHWAY                                       | -1.55 | 0.049 | 0.119 |
| REACTOME_SHC1_EVENTS_IN_ERBB4_SIGNALING                             | -1.55 | 0.050 | 0.119 |
| KEGG_TYPE_I_DIABETES_MELLITUS                                       | -1.55 | 0.045 | 0.119 |
| HALLMARK_GLYCOLYSIS                                                 | -1.54 | 0.045 | 0.127 |

**Supplemental Table 4.** Expression of 80 chemokines, cytokines, growth factors and adhesion molecules in the supernatant fraction and cell fraction of bone marrow from *Sbds<sup>fl</sup>* and *Mx1<sup>Cre</sup>Sbds<sup>Exc</sup>* mice at 48 hours after TBI and baseline measured by ELISA

| Protein              | Supernatant fraction: 48 hours after TBI |                                            |         | Cell fraction: 48 hours after TBI |                                            |         |
|----------------------|------------------------------------------|--------------------------------------------|---------|-----------------------------------|--------------------------------------------|---------|
|                      | <i>Sbds<sup>fl</sup></i>                 | <i>Mx1<sup>Cre</sup>Sbds<sup>Exc</sup></i> | P value | <i>Sbds<sup>fl</sup></i>          | <i>Mx1<sup>Cre</sup>Sbds<sup>Exc</sup></i> | P value |
|                      | Mean ± SD (pg/mL)                        | Mean ± SD (pg/mL)                          |         | Mean ± SD (pg/mL)                 | Mean ± SD (pg/mL)                          |         |
| AR                   | 6.8 ± 9.9                                | 15.9 ± 15.5                                | 0.318   | 0 ± 0                             | 3.2 ± 6.4                                  | 0.356   |
| Axl                  | 154.6 ± 64.0                             | 118.5 ± 155.2                              | 0.651   | 10.6 ± 15.5                       | 0 ± 0                                      | 0.221   |
| CD27L                | 65.5 ± 61.1                              | 2.1 ± 2.6                                  | 0.065   | 0 ± 0                             | 0 ± 0                                      | N/A     |
| CD30 (TNFRSF8)       | 72.1 ± 45.0                              | 98.6 ± 35.3                                | 0.358   | 0 ± 0                             | 2.2 ± 4.5                                  | 0.356   |
| CD40 (TNFRSF5)       | 6.0 ± 9.7                                | 8.1 ± 16.3                                 | 0.809   | 0 ± 0                             | 2.1 ± 4.2                                  | 0.356   |
| CXCL16               | 48.6 ± 8.7                               | 51.6 ± 7.0                                 | 0.592   | 1 ± 1.2                           | 1.2 ± 2.4                                  | 0.886   |
| EGF                  | 5.0 ± 7.3                                | 0.0 ± 0.0                                  | 0.199   | 1.2 ± 1.7                         | 0.3 ± 0.7                                  | 0.342   |
| E-selectin           | 190.4 ± 54.0                             | 749.5 ± 328.5                              | 0.005*  | 0 ± 0                             | 1.9 ± 2.2                                  | 0.136   |
| Fractalkine (CX3CL1) | 243.7 ± 173.8                            | 170.5 ± 125.6                              | 0.495   | 0 ± 0                             | 0 ± 0                                      | N/A     |
| GITR (TNFRSF18)      | 814.9 ± 88.0                             | 720.3 ± 113.1                              | 0.192   | 16.6 ± 15.8                       | 16.2 ± 16.1                                | 0.975   |
| HGF                  | 1090.1 ± 256.3                           | 1845.6 ± 720.7                             | 0.059   | 134.6 ± 279.8                     | 257 ± 358.7                                | 0.542   |
| IGFBP-2              | 1060.6 ± 233.0                           | 2080.4 ± 704.0                             | 0.015*  | 11.3 ± 13.3                       | 30.8 ± 27                                  | 0.137   |
| IGFBP-3              | 8478.7 ± 1666.8                          | 12996.3 ± 3051.6                           | 0.020*  | 354.2 ± 457.2                     | 729 ± 546.4                                | 0.252   |
| IGFBP-5              | 694.3 ± 192.1                            | 413.1 ± 98.2                               | 0.025*  | 35.8 ± 20.6                       | 42.1 ± 20.9                                | 0.680   |
| IGFBP-6              | 1884.5 ± 739.5                           | 1498.3 ± 243.2                             | 0.338   | 3.6 ± 4.4                         | 9.4 ± 18.3                                 | 0.556   |
| IGF-I                | 79821.2 ± 13483.7                        | 36653.5 ± 15988.1                          | 0.002*  | 313.4 ± 460                       | 449.9 ± 563.1                              | 0.671   |
| IL-12p70             | 599.8 ± 309.5                            | 497.1 ± 197.8                              | 0.576   | 6.9 ± 12.3                        | 17.9 ± 21.2                                | 0.295   |
| IL-17E (IL-25)       | 55.1 ± 52.8                              | 73.0 ± 48.2                                | 0.612   | 8.8 ± 18.6                        | 14.7 ± 24.2                                | 0.658   |
| IL-17F               | 45.3 ± 51.5                              | 61.3 ± 22.7                                | 0.574   | 10.4 ± 27.4                       | 18.1 ± 36.2                                | 0.695   |
| IL-1ra (IL-1 F3)     | 20.8 ± 5.5                               | 100.8 ± 44.8                               | 0.004*  | 0.6 ± 1.1                         | 0.8 ± 1.5                                  | 0.809   |
| IL-2 Ra              | 23.8 ± 31.8                              | 11.8 ± 6.8                                 | 0.473   | 0 ± 0                             | 0 ± 0                                      | N/A     |
| IL-20                | 565.4 ± 128.6                            | 490.6 ± 71.7                               | 0.322   | 109.7 ± 105.4                     | 166.3 ± 120                                | 0.435   |
| IL-23                | 1407.0 ± 727.2                           | 1116.5 ± 178.9                             | 0.451   | 68.2 ± 136.3                      | 0 ± 0                                      | 0.356   |
| IL-28                | 62.1 ± 43.8                              | 51.3 ± 19.6                                | 0.655   | 3.7 ± 4.7                         | 6.6 ± 4                                    | 0.369   |
| I-TAC (CXCL11)       | 185.7 ± 79.3                             | 184.6 ± 102.4                              | 0.986   | 0 ± 0                             | 0 ± 0                                      | N/A     |
| MDC (CCL22)          | 4.8 ± 2.0                                | 1.4 ± 0.9                                  | 0.012*  | 0.3 ± 0.5                         | 0 ± 0                                      | 0.300   |
| MIP-2                | 37.8 ± 29.2                              | 31.4 ± 17.6                                | 0.703   | 8.4 ± 4.9                         | 15.4 ± 8.3                                 | 0.107   |
| MIP-3a (CCL20)       | 17.0 ± 9.7                               | 24.3 ± 11.2                                | 0.323   | 0 ± 0                             | 0 ± 0                                      | N/A     |
| OPN (SPP1)           | 7389.3 ± 503.3                           | 10602.6 ± 973.6                            | 0.000*  | 2945.3 ± 1783.8                   | 3126.7 ± 1086.6                            | 0.868   |
| OPG                  | 335.6 ± 111.7                            | 216.5 ± 40.1                               | 0.071   | 20.5 ± 12.8                       | 14.4 ± 9.4                                 | 0.426   |
| Prolactin            | 41.8 ± 28.8                              | 104.9 ± 53.5                               | 0.051   | 0 ± 0                             | 2.9 ± 5.8                                  | 0.356   |
| Pro-MMP-9            | 50011.4 ± 13711.6                        | 38635.5 ± 11850.6                          | 0.220   | 43475.3 ± 26090.7                 | 58209.4 ± 19248.1                          | 0.398   |
| P-selectin           | 37660.7 ± 14127.8                        | 24742.6 ± 10982.2                          | 0.166   | 6927.8 ± 1587.2                   | 2679.1 ± 1816.9                            | 0.012*  |
| Resistin             | 339.0 ± 82.0                             | 431.5 ± 72.8                               | 0.110   | 13.5 ± 8                          | 25.4 ± 5.9                                 | 0.053   |
| SCF                  | 10.7 ± 10.3                              | 5.1 ± 4.6                                  | 0.338   | 2 ± 3                             | 1.7 ± 2.3                                  | 0.852   |
| SDF-1a (CXCL12)      | 606.0 ± 148.2                            | 184.6 ± 58.6                               | 0.000*  | 16.2 ± 11.4                       | 11.2 ± 10.3                                | 0.489   |
| TPO                  | 296.4 ± 200.3                            | 394.8 ± 247.3                              | 0.526   | 0.7 ± 1.8                         | 1.2 ± 2.3                                  | 0.695   |
| VCAM-1 (CD106)       | 2831.1 ± 682.6                           | 4683.0 ± 1362.7                            | 0.027*  | 1979.8 ± 1334.4                   | 2198.4 ± 1780.4                            | 0.821   |
| VEGF                 | 138.4 ± 105.0                            | 56.9 ± 30.2                                | 0.163   | 61.5 ± 82.6                       | 84.1 ± 101.4                               | 0.696   |

|                    |                                       |                     |        |                                |                    |        |
|--------------------|---------------------------------------|---------------------|--------|--------------------------------|--------------------|--------|
| VEGF-D             | 17.4 ± 7.3                            | 10.4 ± 1.8          | 0.094  | 0 ± 0                          | 0.6 ± 1.2          | 0.356  |
| bFGF               | 133.3 ± 34.8                          | 98.0 ± 26.3         | 0.125  | 157 ± 49                       | 205.7 ± 77.7       | 0.330  |
| BLC (CXCL13)       | 39.1 ± 25.1                           | 211.8 ± 124.0       | 0.015* | 81.3 ± 44.9                    | 197.8 ± 96.5       | 0.071  |
| CD30L              | 381.7 ± 498.9                         | 59.8 ± 60.5         | 0.227  | 19.2 ± 38.4                    | 35.2 ± 70.4        | 0.704  |
| Eotaxin(CCL11)     | 95.1 ± 41.1                           | 42.0 ± 24.8         | 0.048* | 241.2 ± 60                     | 165.6 ± 74.3       | 0.164  |
| Eotaxin-2 (CCL24)  | 65.3 ± 24.2                           | 52.3 ± 20.2         | 0.408  | 59.6 ± 41.3                    | 54.3 ± 13.4        | 0.815  |
| Fas L (TNFSF6)     | 7.8 ± 10.1                            | 1.7 ± 1.4           | 0.257  | 16.5 ± 14.3                    | 18.3 ± 15          | 0.867  |
| G-CSF              | 3.0 ± 6.5                             | 5.0 ± 10.0          | 0.721  | 37.5 ± 54.8                    | 126.9 ± 108.9      | 0.192  |
| GM-CSF             | 267.3 ± 407.7                         | 821.3 ± 537.8       | 0.113  | 423.1 ± 846.2                  | 618.9 ± 1028.7     | 0.779  |
| ICAM-1 (CD54)      | 1768.2 ± 923.1                        | 2115.9 ± 768.4      | 0.559  | 28987.1 ± 770.5                | 35345.2 ± 17872.8  | 0.538  |
| IFNg               | 3984.9 ± 3248.3                       | 2072.7 ± 844.6      | 0.277  | 2727.8 ± 3109.3                | 1643.4 ± 1244.8    | 0.541  |
| IL-1a              | 60.3 ± 42.2                           | 56.5 ± 18.1         | 0.867  | 51.7 ± 52.5                    | 54.7 ± 37.6        | 0.929  |
| IL-1b              | 0.7 ± 0.7                             | 0.4 ± 0.4           | 0.440  | 10.9 ± 12.5                    | 5.3 ± 7.7          | 0.476  |
| IL-2               | 934.7 ± 883.7                         | 340.4 ± 132.1       | 0.211  | 135.2 ± 133.8                  | 58.7 ± 67.1        | 0.346  |
| IL-3               | 18.9 ± 27.6                           | 35.5 ± 27.7         | 0.393  | 22.3 ± 44.5                    | 14.6 ± 29.3        | 0.784  |
| IL-4               | 0.9 ± 1.6                             | 0.2 ± 0.5           | 0.411  | 5.8 ± 7.0                      | 9.1 ± 14.8         | 0.704  |
| IL-5               | 17.5 ± 39.0                           | 5.0 ± 10.0          | 0.544  | 17.6 ± 35.1                    | 6.7 ± 13.4         | 0.584  |
| IL-6               | 296.4 ± 399.4                         | 15.7 ± 20.2         | 0.189  | 90.1 ± 180.2                   | 3.5 ± 7            | 0.374  |
| IL-7               | 2.4 ± 2.5                             | 4.1 ± 4.1           | 0.463  | 10.4 ± 13.1                    | 3.3 ± 2.3          | 0.328  |
| IL-10              | 20.8 ± 30.5                           | 13.0 ± 16.0         | 0.649  | 70.2 ± 76.7                    | 111.4 ± 109.1      | 0.559  |
| IL-12p40           | 49.1 ± 81.0                           | 8.2 ± 8.3           | 0.336  | 9.5 ± 9.5                      | 6.3 ± 7.9          | 0.629  |
| IL-13              | 7243.5 ± 5738.2                       | 10485.1 ± 6015.6    | 0.430  | 11385.7 ± 7702.1               | 10079 ± 3941.4     | 0.773  |
| IL-15              | 1600.2 ± 2040.9                       | 3386.4 ± 1786.1     | 0.200  | 2880.4 ± 3640.8                | 2951 ± 5168        | 0.983  |
| IL-17              | 6.1 ± 7.6                             | 8.1 ± 9.7           | 0.737  | 5 ± 10                         | 4.6 ± 9.3          | 0.962  |
| IL-21              | 5.3 ± 6.9                             | 5.0 ± 3.5           | 0.935  | 26.7 ± 18.1                    | 13.9 ± 20.5        | 0.386  |
| KC (CXCL1)         | 127.5 ± 106.3                         | 10.6 ± 10.6         | 0.054  | 205.1 ± 238.7                  | 222.9 ± 247.3      | 0.921  |
| Leptin             | 616.3 ± 288.9                         | 383.3 ± 279.2       | 0.252  | 0.9 ± 1.2                      | 0.1 ± 0.2          | 0.250  |
| LIX(CXCL5)         | 21.4 ± 33.0                           | 0.0 ± 0.0           | 0.222  | 3925.5 ± 5449.2                | 3160.7 ± 5465.1    | 0.849  |
| MCP-1 (CCL2)       | 47.7 ± 46.0                           | 28.5 ± 35.5         | 0.508  | 161.8 ± 186.6                  | 173.2 ± 136.4      | 0.925  |
| MCP-5 (CCL12)      | 117.8 ± 57.8                          | 81.0 ± 32.6         | 0.282  | 180.5 ± 96.1                   | 157.5 ± 98.4       | 0.749  |
| M-CSF              | 54.6 ± 37.8                           | 17.3 ± 19.4         | 0.104  | 170.7 ± 195.8                  | 114.9 ± 128        | 0.650  |
| MIG (CXCL9)        | 9407.8 ± 3597.8                       | 1924.8 ± 1027.7     | 0.003* | 7122.9 ± 3814.1                | 3559.4 ± 1128.6    | 0.123  |
| MIP-1a (CCL3)      | 79.2 ± 41.1                           | 304.4 ± 188.9       | 0.030* | 282.1 ± 110.4                  | 307.9 ± 140.9      | 0.783  |
| MIP-1g (CCL9)      | 726.2 ± 224.6                         | 2432.4 ± 1057.5     | 0.007* | 1667.7 ± 806.1                 | 4753.1 ± 630.6     | 0.001* |
| PF-4               | 453484.1 ± 172603.4                   | 328754.0 ± 126816.7 | 0.256  | 313168.2 ± 110551.5            | 396393.1 ± 47056.1 | 0.385  |
| RANTES (CCL5)      | 210.6 ± 86.5                          | 160.6 ± 94.2        | 0.429  | 947.2 ± 274.6                  | 485.7 ± 107.1      | 0.020* |
| TARC (CCL17)       | 100.4 ± 126.3                         | 180.6 ± 86.4        | 0.305  | 196.3 ± 167.2                  | 213.1 ± 150.9      | 0.886  |
| TCA-3 (CCL1)       | 0.0 ± 0.0                             | 0.0 ± 0.0           | NA     | 0 ± 0                          | 77.6 ± 98.4        | 0.166  |
| TNF RI (TNFRSF1A)  | 295.5 ± 64.4                          | 246.0 ± 89.6        | 0.362  | 716.3 ± 552                    | 837.8 ± 701.6      | 0.795  |
| TNF RII (TNFRSF1B) | 186.7 ± 69.8                          | 152.1 ± 58.4        | 0.446  | 112.4 ± 159.1                  | 97.3 ± 147.2       | 0.893  |
| TNFa               | 3.3 ± 4.7                             | 0.9 ± 1.7           | 0.349  | 0 ± 0                          | 0 ± 0              | N/A    |
|                    | <b>Supernatant fraction: baseline</b> |                     |        | <b>Cell fraction: baseline</b> |                    |        |
| CD27L              | 5.7 ± 3.5                             | 8.4 ± 4.6           | 0.267  | 8.8 ± 10.9                     | 10 ± 5.3           | 0.827  |
| E-selectin         | 28.7 ± 20.4                           | 20 ± 2              | 0.373  | 7.2 ± 3                        | 8.2 ± 2.4          | 0.553  |
| HGF                | 315.7 ± 206.0                         | 216.8 ± 117.3       | 0.360  | 760.6 ± 315.1                  | 451.5 ± 302.2      | 0.119  |
| IGFBP-2            | 28 ± 17.4                             | 56.6 ± 46.5         | 0.162  | 41.5 ± 20.2                    | 43.3 ± 53.8        | 0.936  |

|                  |                 |                |         |                |                 |        |
|------------------|-----------------|----------------|---------|----------------|-----------------|--------|
| IGFBP-3          | 365.3 ± 174.1   | 273.5 ± 27.9   | 0.276   | 20.3 ± 8.3     | 16 ± 8.2        | 0.395  |
| IGFBP-5          | 416 ± 127.2     | 816.3 ± 110.2  | 0.0002* | 153.7 ± 141.3  | 86 ± 40.9       | 0.328  |
| IGF-I            | 96 ± 40.4       | 215.5 ± 73.5   | 0.005*  | 0.4 ± 0.2      | 3.2 ± 4.8       | 0.144  |
| IL-1ra (IL-1 F3) | 3.2 ± 1         | 3 ± 1          | 0.802   | 2 ± 1.5        | 1.6 ± 1.6       | 0.637  |
| MDC (CCL22)      | 4.3 ± 2         | 6.9 ± 2.6      | 0.075   | 1.7 ± 0.5      | 1.8 ± 0.6       | 0.866  |
| MIP-3a (CCL20)   | 1.3 ± 0.9       | 0.8 ± 0.6      | 0.259   | 0.5 ± 0.4      | 0.7 ± 0.3       | 0.395  |
| OPN (SPP1)       | 2708.2 ± 1135.3 | 3242 ± 1644.8  | 0.519   | 41.8 ± 23.4    | 63.1 ± 32.2     | 0.212  |
| OPG              | 180.1 ± 112.6   | 148 ± 41.5     | 0.561   | 30.2 ± 16.9    | 28.5 ± 7.4      | 0.840  |
| P-selectin       | 1449.4 ± 376.7  | 2145.2 ± 813.1 | 0.072   | 1793.7 ± 827   | 1442.1 ± 1120   | 0.544  |
| SDF-1a (CXCL12)  | 32.6 ± 16.8     | 35.4 ± 23.7    | 0.812   | 7.3 ± 2.8      | 13.3 ± 7.4      | 0.076  |
| VCAM-1 (CD106)   | 2701 ± 564.7    | 2926 ± 712.1   | 0.554   | 2722.1 ± 926.7 | 2293.3 ± 1468.2 | 0.550  |
| VEGF             | 5.1 ± 2.8       | 7 ± 3.7        | 0.336   | 20.4 ± 6.6     | 14.8 ± 2.9      | 0.107  |
| BLC (CXCL13)     | 10.4 ± 4.8      | 7.7 ± 4.4      | 0.346   | 7.1 ± 4.4      | 8.5 ± 1.9       | 0.532  |
| G-CSF            | 0.0 ± 0.1       | 0.1 ± 0.2      | 0.299   | 0.4 ± 0.5      | 1.1 ± 0.6       | 0.071  |
| GM-CSF           | 8.4 ± 5.5       | 4.9 ± 3.5      | 0.246   | 39.7 ± 7.7     | 36.7 ± 13.1     | 0.631  |
| IL-5             | 6.9 ± 8.9       | 15.5 ± 14.2    | 0.223   | 13.5 ± 21.9    | 40 ± 12.6       | 0.036* |
| KC (CXCL1)       | 4.1 ± 4.6       | 5.3 ± 5.2      | 0.677   | 12.3 ± 5       | 24.7 ± 9.5      | 0.015* |
| Leptin           | 14 ± 16.1       | 78.6 ± 24      | 0.000*  | 4.5 ± 5.2      | 16 ± 9.6        | 0.022* |
| M-CSF            | 0.2 ± 0.1       | 0.3 ± 0.5      | 0.482   | 1.7 ± 3.5      | 0.5 ± 0.5       | 0.455  |
| MIG (CXCL9)      | 88.5 ± 37.1     | 109 ± 22.6     | 0.301   | 43.8 ± 22.3    | 73.2 ± 22.4     | 0.048* |
| MIP-1a (CCL3)    | 13.1 ± 7.2      | 14.5 ± 7.1     | 0.760   | 25.8 ± 7.3     | 27.7 ± 8.4      | 0.687  |
| MIP-1g (CCL9)    | 115.2 ± 46.3    | 100 ± 42.6     | 0.575   | 508.4 ± 116.7  | 345.2 ± 217.1   | 0.121  |
| RANTES (CCL5)    | 47.4 ± 30.4     | 78.2 ± 27.4    | 0.101   | 5.6 ± 4.3      | 7 ± 3.6         | 0.572  |

\*  $p < 0.05$ , Student's t-test.

Supplemental Figure 1

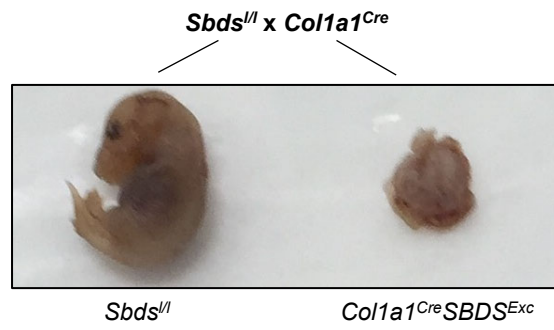



## Supplemental Figure 2

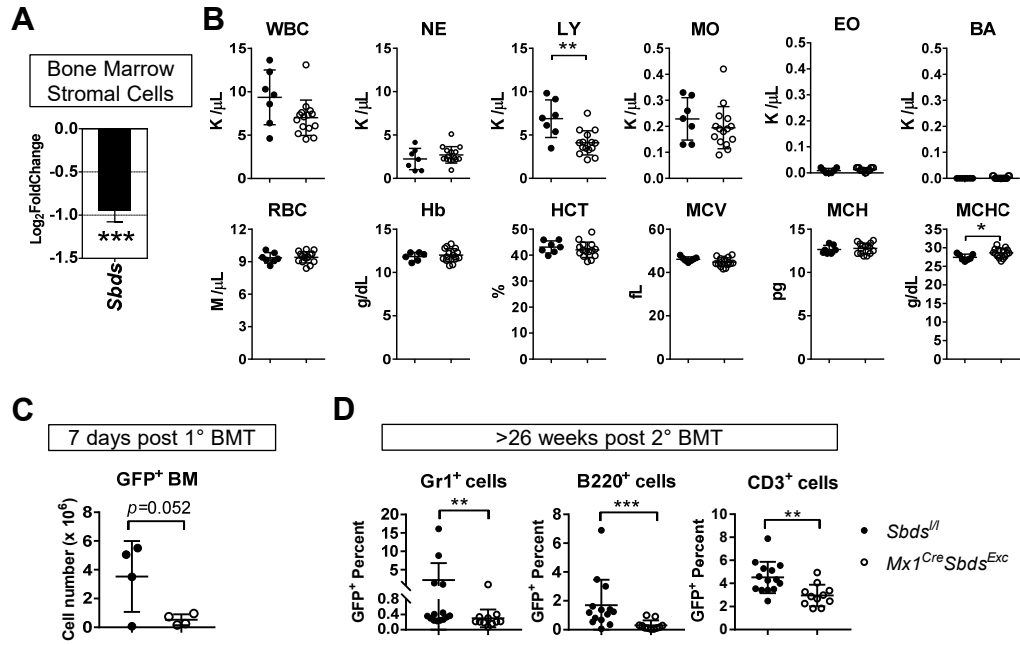

### Supplemental Figure 3

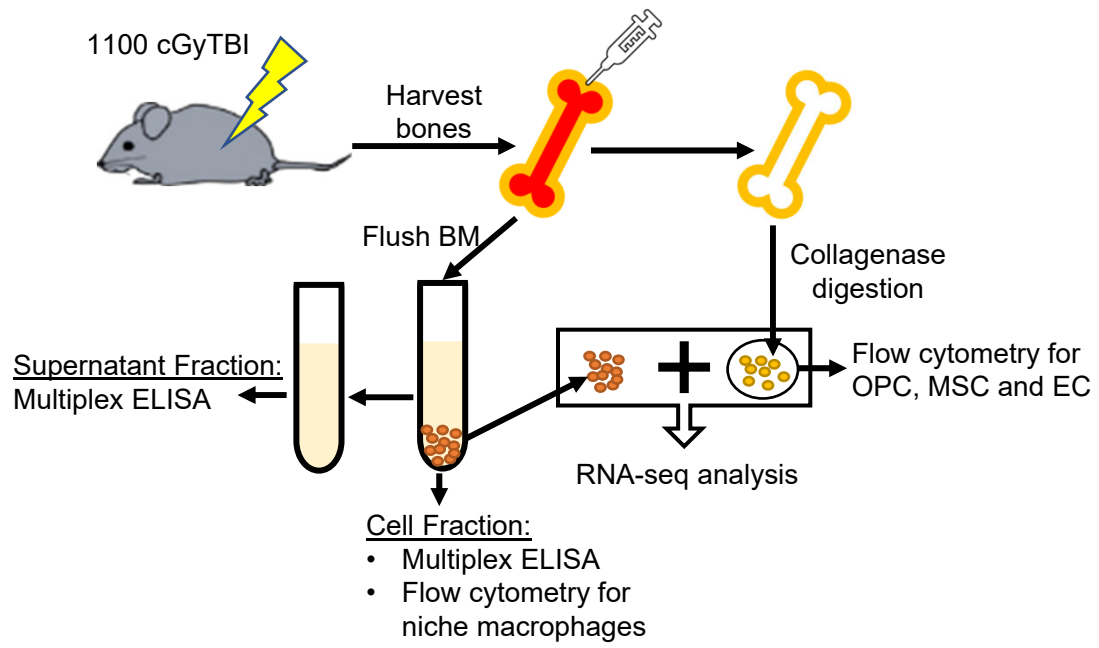

# Supplemental Figure 4

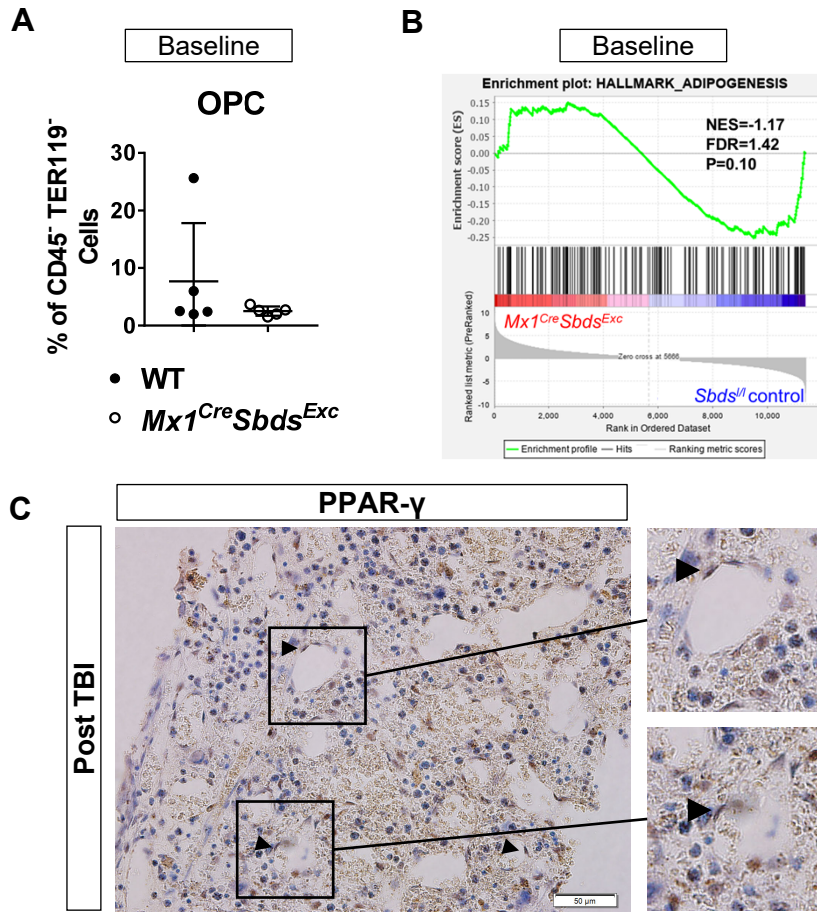

# Supplemental Figure 5

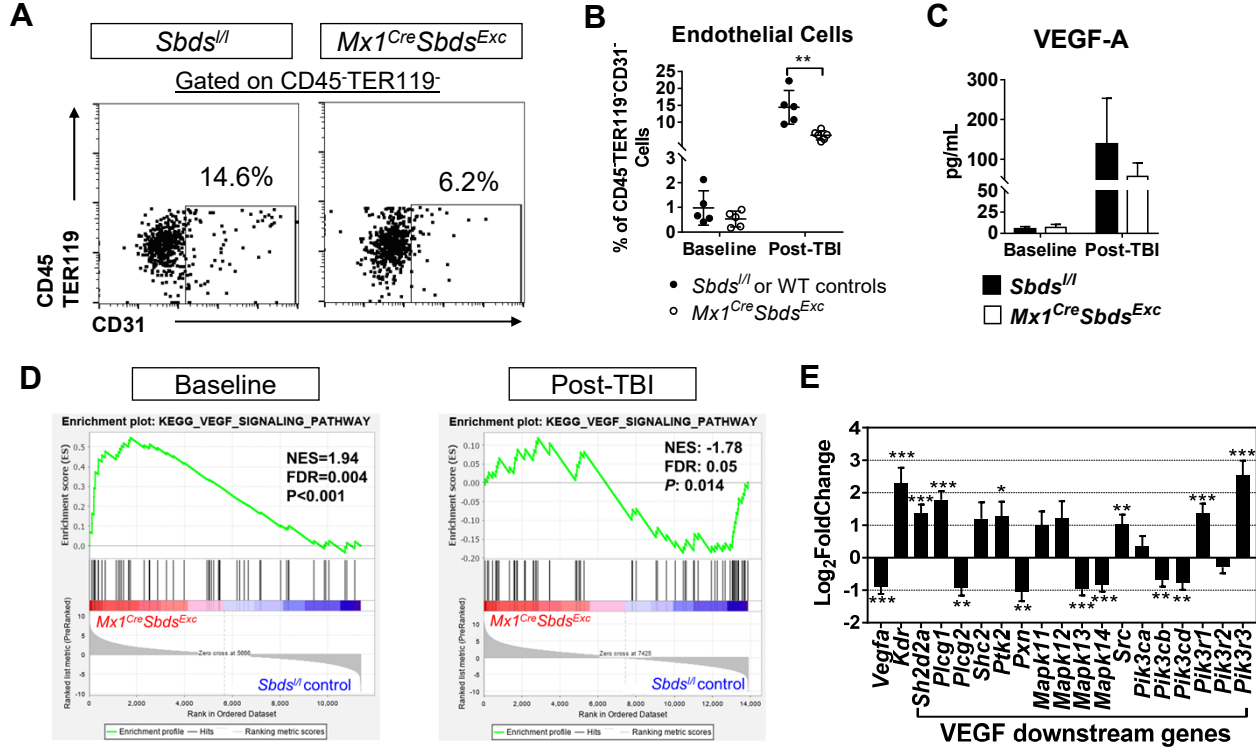

# Supplemental Figure 6

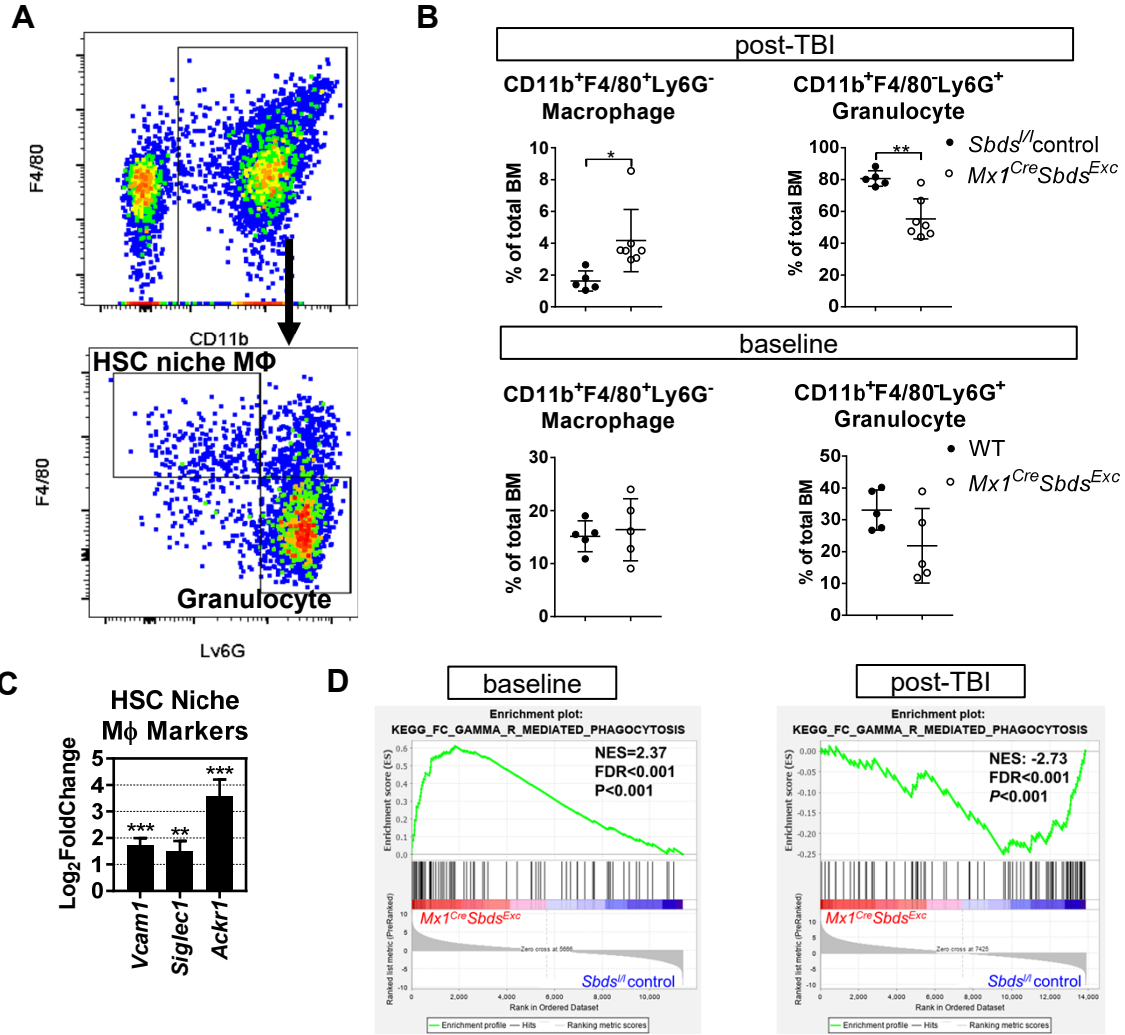

Supplemental Figure 7

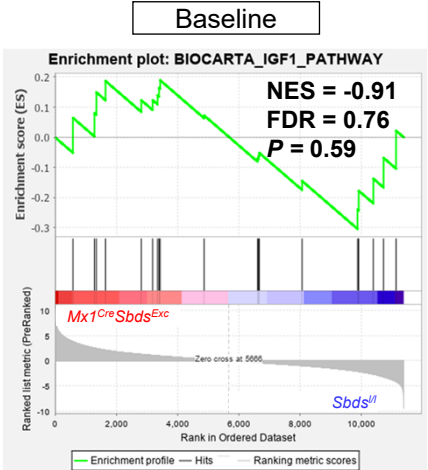

# Supplemental Figure 8

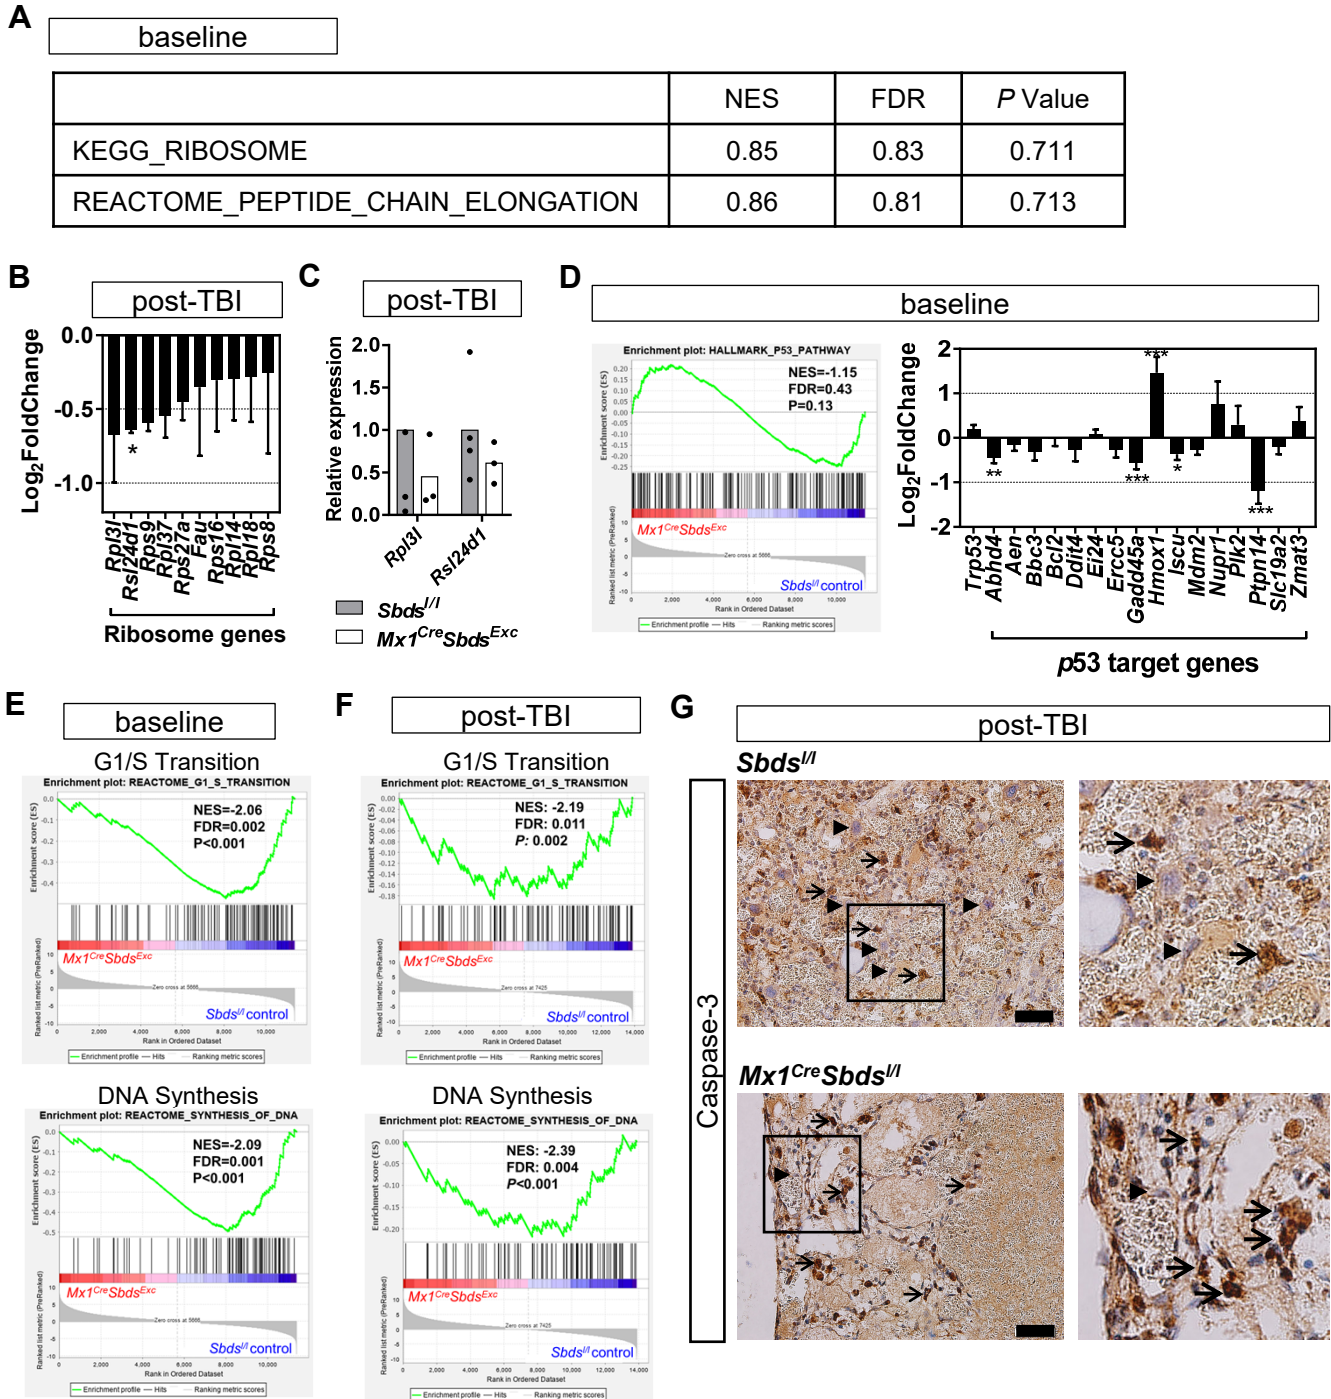

**Supplemental Figure 1: Developmental Defects in *col1a1<sup>Cre</sup>Sbds<sup>Exc</sup>* strain.** Representative images of *Sbds<sup>fl</sup>* and *col1a1<sup>Cre</sup>Sbds<sup>Exc</sup>* fetuses at embryonic stage E12-E15, showing severe developmental skeletal abnormalities prohibiting viability. No pups with the *col1a1<sup>Cre</sup>Sbds<sup>Exc</sup>* genotype survived to delivery.

**Supplemental Figure 2: *Mx1<sup>Cre</sup>Sbds<sup>Exc</sup>* mice exhibit disrupted hematopoiesis and impaired niche capacity to engraft donor HSC.** (A) Expression of *Sbds* mRNA in isolated CD45<sup>neg</sup> BM stromal cells is reduced in *Mx1<sup>Cre</sup>Sbds<sup>Exc</sup>* mice compared to *Sbds<sup>fl</sup>* controls, as shown in RNA-seq analysis. \*\*\* $p < 0.001$ , DESeq2 statistical test. (B) Complete blood count analysis of white blood cells (WBC), neutrophils (NE), lymphocytes (LY), monocytes (MO), eosinophils (EO), basophils (BA), red blood cells (RBC), hemoglobin (Hb), hematocrit (HCT), mean corpuscular volume (MCV), mean corpuscular hemoglobin (MCH) and mean corpuscular hemoglobin concentration (MCHC) in *Sbds<sup>fl</sup>* (n=7) and *Mx1<sup>Cre</sup>Sbds<sup>Exc</sup>* mice (n=12). 100 microliter peripheral blood was collected from retro-orbital plexus of the mice anesthetized under isoflurane and stored in microcentrifuge tubes containing EDTA. Complete blood counts were analyzed using Hemavet 950FS (Drew Scientific Group). \* $p < 0.05$ , \*\* $p < 0.01$ , Student's t-test. (C) *Mx1<sup>Cre</sup>Sbds<sup>Exc</sup>* primary recipients exhibit low numbers of engrafted healthy GFP<sup>+</sup> donor BM cells compared to *Sbds<sup>fl</sup>* control recipients at 1 week post-BMT (n=4 mice per group). (D) Examination of GFP<sup>+</sup> cell percentages within BM cell populations in WT secondary recipients beyond 26 weeks post-secondary BMT. These secondary recipients had received WT competitor BM plus either *Mx1<sup>Cre</sup>Sbds<sup>Exc</sup>* or control (*Sbds<sup>fl</sup>*) primary recipient BM marrow collected 7 days after these primary recipients had undergone myeloablative BMT using GFP<sup>+</sup> donor BM. (n=4 primary recipients and n =14 secondary recipients per group). HSC engraftment in primary recipient *Mx1<sup>Cre</sup>Sbds<sup>Exc</sup>* mice was significantly impaired, as indicated by lower GFP<sup>+</sup> reconstitution of secondary recipient trilineage BM hematopoiesis, including Gr1<sup>+</sup> myeloid cells, B220<sup>+</sup> B cells, and CD3<sup>+</sup> T cells. \*\* $p < 0.01$ , \*\*\* $p < 0.001$ , Mann-Whitney test.



**Supplemental Figure 3: Experimental Scheme defining sample collections for ELISA and RNA-seq analysis on the BM niche of irradiated mice.** For ELISA analysis, BM was flushed out from femora and tibiae of mice 48 hours after 1100cGy TBI using a constant volume of PBS per bone to enable intragroup and interstrain comparisons of extracellular protein levels. The cell suspension was centrifuged, and the BM plasma supernatant and BM cell fractions were applied without dilution for multiplex ELISA analysis separately. For RNA-seq analysis and flow cytometry analysis of BM niche cells, after non-adherent BM was flushed out at 24 hours after 1100cGy TBI leg bones were digested using collagenase. The cellular fraction of BM and digested bones were pooled together and applied for RNA-seq analysis. For flow cytometry analysis, the flushed BM cell fraction was used for analysis of HSC niche macrophages. The cells collected from bone digestion were used for analyzing osteoprogenitors (OPC), mesenchymal stem cells (MSC) and endothelial cells (EC).

**Supplemental Figure 4: Effects of SBDS deficiency on baseline BM osteoprogenitor cells (OPC) and adipogenesis. (A)** Unirradiated *Mx1<sup>Cre</sup>Sbds<sup>Exc</sup>* mice show no significant baseline reduction in OPC as a percentage of all CD45<sup>-</sup>TER119<sup>-</sup> BM stromal cells compared to wildtype (WT) controls. n= 5 mice per group.  $p=0.29$ , Student's t-test. **(B)** Gene set enrichment analysis (GSEA) plot shows no significant changes of adipogenesis-related gene expression in the BM stromal cells of *Mx1<sup>Cre</sup>SBDS<sup>Exc</sup>* mice versus controls (n=3 mice per group) at baseline. NES: Normalized Enrichment Score. FDR: False Discovery Rate. GSEA statistical test. **(C)** Immunohistochemistry staining indicates a majority of adipocytes present in *Mx1<sup>Cre</sup>SBDS<sup>Exc</sup>* BM at 48 hours after 1100cGy TBI are PPAR- $\gamma$  positive, indicative of recent differentiation. Black arrowheads identify the PPAR- $\gamma$ -positive nucleus of adipocytes. Scale bar: 50 $\mu$ m.

**Supplemental Figure 5: BM niches of irradiated *Mx1<sup>Cre</sup>SBDS<sup>Exc</sup>* mice show decreased endothelial cells (EC) and alterations in VEGF signaling. (A)** Representative dot plots show the gating strategies and percentages of CD45<sup>-</sup>TER119<sup>-</sup>CD31<sup>+</sup> ECs in CD45<sup>-</sup>TER119<sup>-</sup> BM stromal

cells. **(B)** The percentage of ECs in CD45<sup>-</sup>TER119<sup>-</sup> BM stromal cells were significantly reduced in *Mx1<sup>Cre</sup>SBDS<sup>Exc</sup>* (n=6) compared to controls (n=5) at 24 hours after 1100cGy TBI. However, no significant change was found at baseline (n=5 mice per group). \*\**p*<0.01, Student's t-test. **(C)** VEGF-A protein expression by ELISA in BM plasma supernatants harvested from *Mx1<sup>Cre</sup>SBDS<sup>Exc</sup>* and control mice at baseline (n=5 for *Mx1<sup>Cre</sup>SBDS<sup>Exc</sup>* group and n=7 for control group) and 48 hours after 1100 cGy TBI (n=5 for *Mx1<sup>Cre</sup>SBDS<sup>Exc</sup>* group and n=6 for control group). **(D)** GSEA plot showing downregulation of VEGF signaling pathway in the BM stromal cells of *Mx1<sup>Cre</sup>SBDS<sup>Exc</sup>* mice versus controls at 24 hours after TBI (n=5 mice per group), but significant upregulation of VEGF signaling pathway at baseline compared to controls (n=3 mice per group). NES: Normalized Enrichment Score. FDR: False Discovery Rate. **(E)** Changes of expression in individual genes related to VEGF signaling pathway in the BM stromal cells of irradiated (24 hours after 1100cGy TBI) *Mx1<sup>Cre</sup>SBDS<sup>Exc</sup>* mice compared to controls. \**p*<0.05, \*\**p*<0.01, \*\*\**p*<0.001, Student's t-test or *DESeq2* test.

**Supplemental Figure 6: SBDS deficiency increases macrophages and decreases phagocytosis in the BM niche after TBI.** **(A)** Representative dot plots show gating strategies for CD11b<sup>+</sup>F4/80<sup>+</sup>Ly6G<sup>-</sup> HSC niche macrophages (MΦ) and CD11b<sup>+</sup>F4/80<sup>-</sup>Ly6G<sup>+</sup> granulocytes within harvested post-TBI BM cells. **(B)** *Mx1<sup>Cre</sup>SBDS<sup>Exc</sup>* mice (n=5) demonstrate higher percentages of CD11b<sup>+</sup>F4/80<sup>+</sup>Ly6G<sup>-</sup> macrophages and lower percentages of CD11b<sup>+</sup>F4/80<sup>-</sup>Ly6G<sup>+</sup> granulocytes in the BM niche than controls (n=7) at 24 hours post-1100 cGy TBI. No significant differences were detected at baseline (n=5 mice per group). \**p*<0.05, \*\**p*<0.01, Student's t-test. **(C)** RNA-seq analysis demonstrating elevated expression of HSC niche macrophage marker genes *Vcam-1*, *Siglec1* (CD169) and *Ackr1* (CD234) in BM stromal cells from irradiated (24 hours after 1100 cGy TBI) *Mx1<sup>Cre</sup>SBDS<sup>Exc</sup>* mice compared to controls. **(D)** GSEA plot demonstrating BM stromal cells of *Mx1<sup>Cre</sup>SBDS<sup>Exc</sup>* mice exhibit downregulation of genes involved in FcγR-mediated phagocytosis at 24 hours post-1100 cGy TBI (n=5 mice per group), but upregulation of these

genes at baseline (n=3 per group). NES: Normalized Enrichment Score. FDR: False Discovery Rate.

**Supplemental Figure 7: IGF-1 pathway gene expression in BM niche cells from baseline, unirradiated mice is unaffected by SBDS Deficiency.** Gene set enrichment analysis plot showing no significant alterations in IGF-1 signaling pathway gene expression in BM stromal cells from *Mx1<sup>Cre</sup>SBDS<sup>Exc</sup>* mice versus controls at baseline. n=3 mice per group. NES: Normalized Enrichment Score. FDR: False Discovery Rate. GSEA statistical test.

**Supplemental Figure 8: Effects of SBDS deficiency on BM niche cell activation of p53 signaling, ribosomal protein expression, cell cycle gene expression, and apoptosis at baseline and following TBI.** (A) GSEA analysis results show no significant change in genes encoding ribosomal proteins and genes associated with peptide chain elongation in BM stromal cells from *Mx1<sup>Cre</sup>Sbds<sup>Exc</sup>* mice versus *Sbds<sup>fl/fl</sup>* mice at baseline. (B) Multiple individual ribosomal genes exhibit a trend towards downregulated niche expression in irradiated (24 hours after 1100cGy TBI) *Mx1<sup>Cre</sup>Sbds<sup>Exc</sup>* mice versus control mice. (C) qPCR shows no significant difference in expression of the ribosomal genes *Rpl3l* and *Rsl24d1* in BM niche cells from irradiated (24 hours after 1100cGy TBI) *Mx1<sup>Cre</sup>Sbds<sup>Exc</sup>* mice (n=3) versus *Sbds<sup>fl/fl</sup>* control mice (n=4). (D) GSEA plot shows no significant change in overall gene expression within p53 pathways in BM niche cells from *Mx1<sup>Cre</sup>Sbds<sup>Exc</sup>* mice versus *Sbds<sup>fl/fl</sup>* mice at baseline (left, n=3 mice per group). Bar plot (right) however does show significant differences in expression of individual p53 target genes, including *Hmox1*, *Gadd45a*, and *Ptpn14*, in BM niche cells from *Mx1<sup>Cre</sup>Sbds<sup>Exc</sup>* mice versus *Sbds<sup>fl/fl</sup>* mice at baseline. (E) GSEA plots indicate overall downregulation of genes related to G1/S cell cycle transition (top) and S-phase DNA synthesis (bottom) in SBDS-deficient BM niche cells compared to controls at baseline (n=3 mice per group). (F) GSEA plots show similar downregulation of genes related to G1/S cell cycle transition (top) and S-phase DNA synthesis (bottom) in *Mx1<sup>Cre</sup>Sbds<sup>Exc</sup>* versus control *Sbds<sup>fl/fl</sup>* niche cells at 24 hours after 1100cGy of TBI (n=5

mice per group). **(G)** Immunohistochemical staining for activated Caspase-3, demonstrating increased apoptotic cells (Caspase-3<sup>+</sup>, brown) as a percentage of total nucleated cells in the BM niche environment of irradiated (48 hours after 1100 cGy of TBI) *Mx1<sup>Cre</sup>Sbds<sup>Exc</sup>* compared to controls. Black Arrows indicate Caspase-3-positive apoptotic BM stromal cells. Black Arrowheads indicate Caspase-3-negative BM stromal cells. NES: Normalized Enrichment Score. FDR: False Discovery Rate. GSEA statistical test or *DEseq2* statistical test. \* $p < 0.05$ , \*\*  $p < 0.01$ , \*\*\* $p < 0.001$ .
